# Supplementary material
Source: Research Square preprint supplement (doi:10.21203/rs.3.rs-10134917/v1)

Due to the high expression levels of the target proteins, parts of bands appear darker, obscuring the ladder in the image and preventing simultaneous visibility. To address this, we explored various solutions. We compared the original bands with the image to accurately locate the ladder and employed a horizontal line with molecular weight annotations to reconstruct the ladder. The original bands are also provided for comparison, with the aim of ensuring this method meets your requirements. Additionally, we have annotated the catalog numbers of the ladders in the original images as requested.


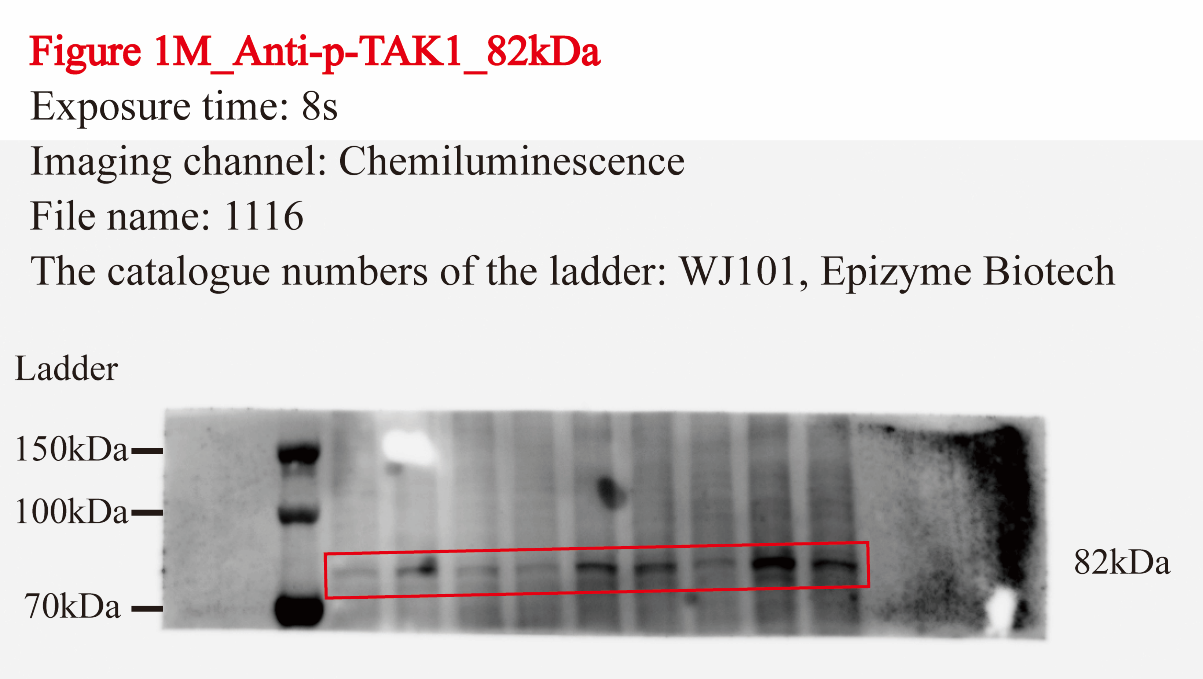


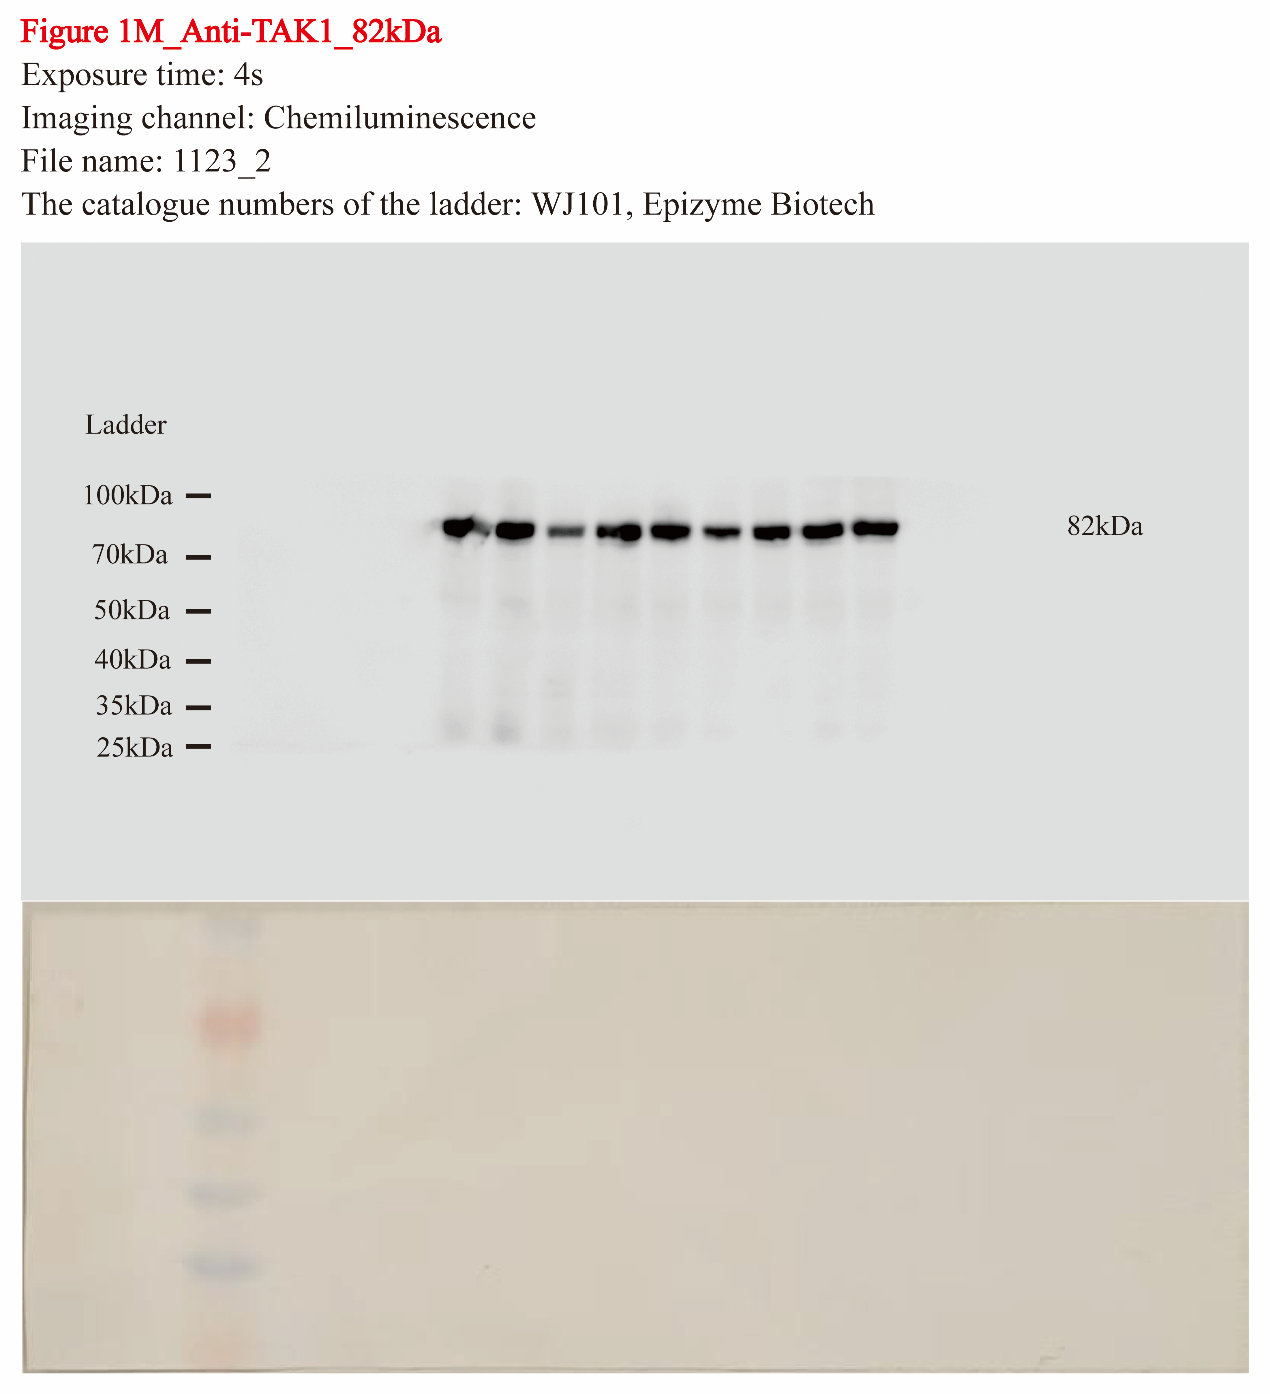


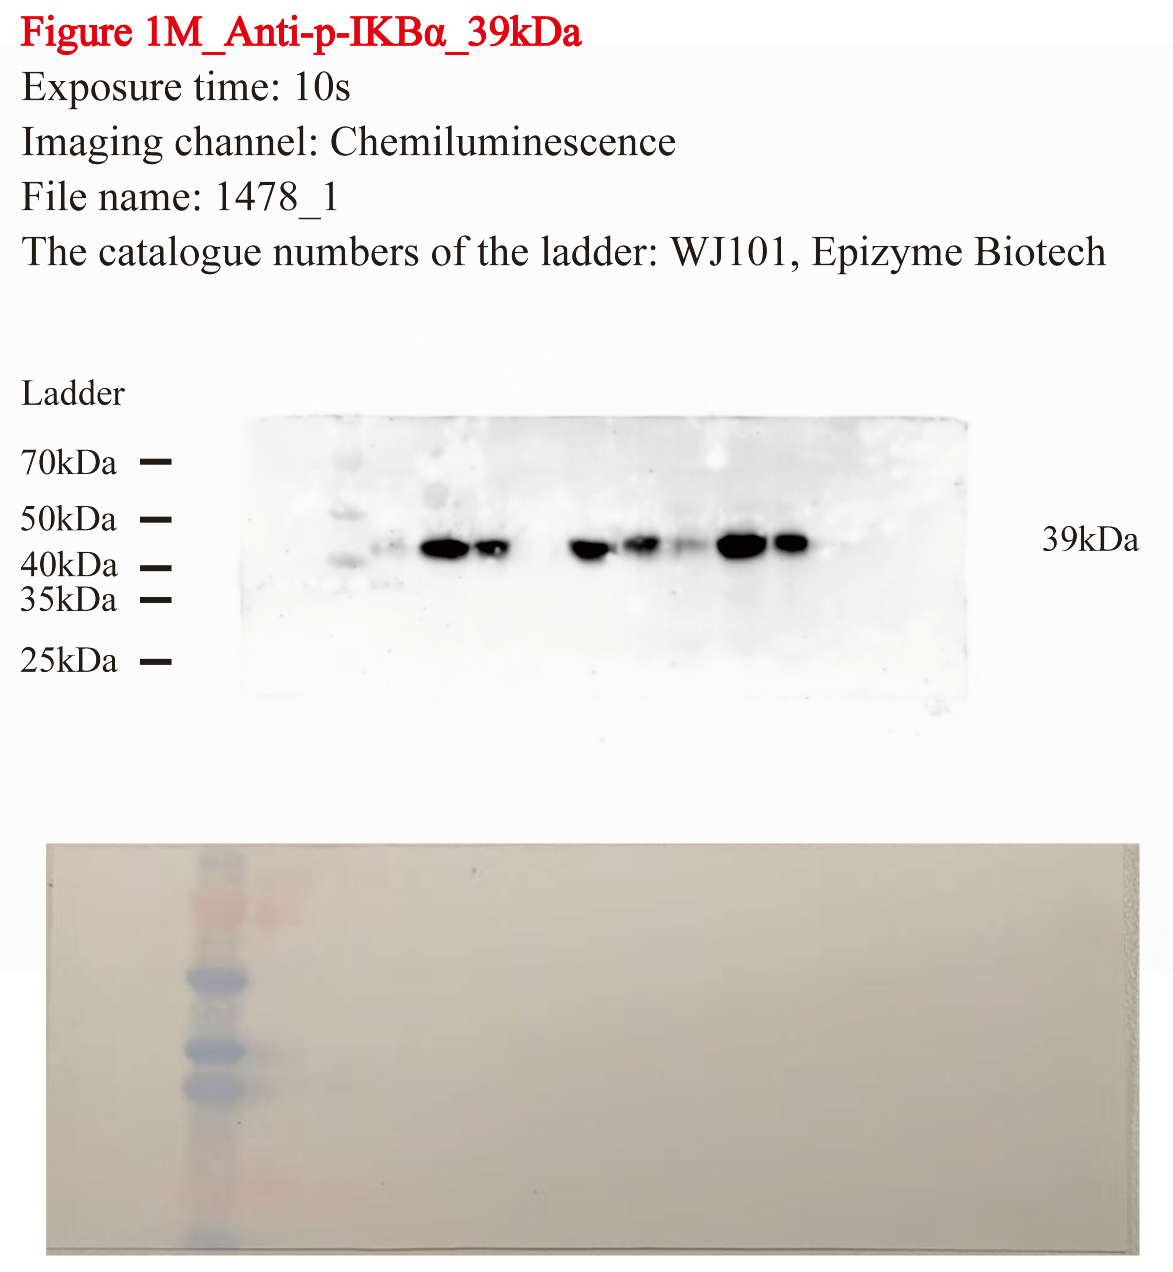


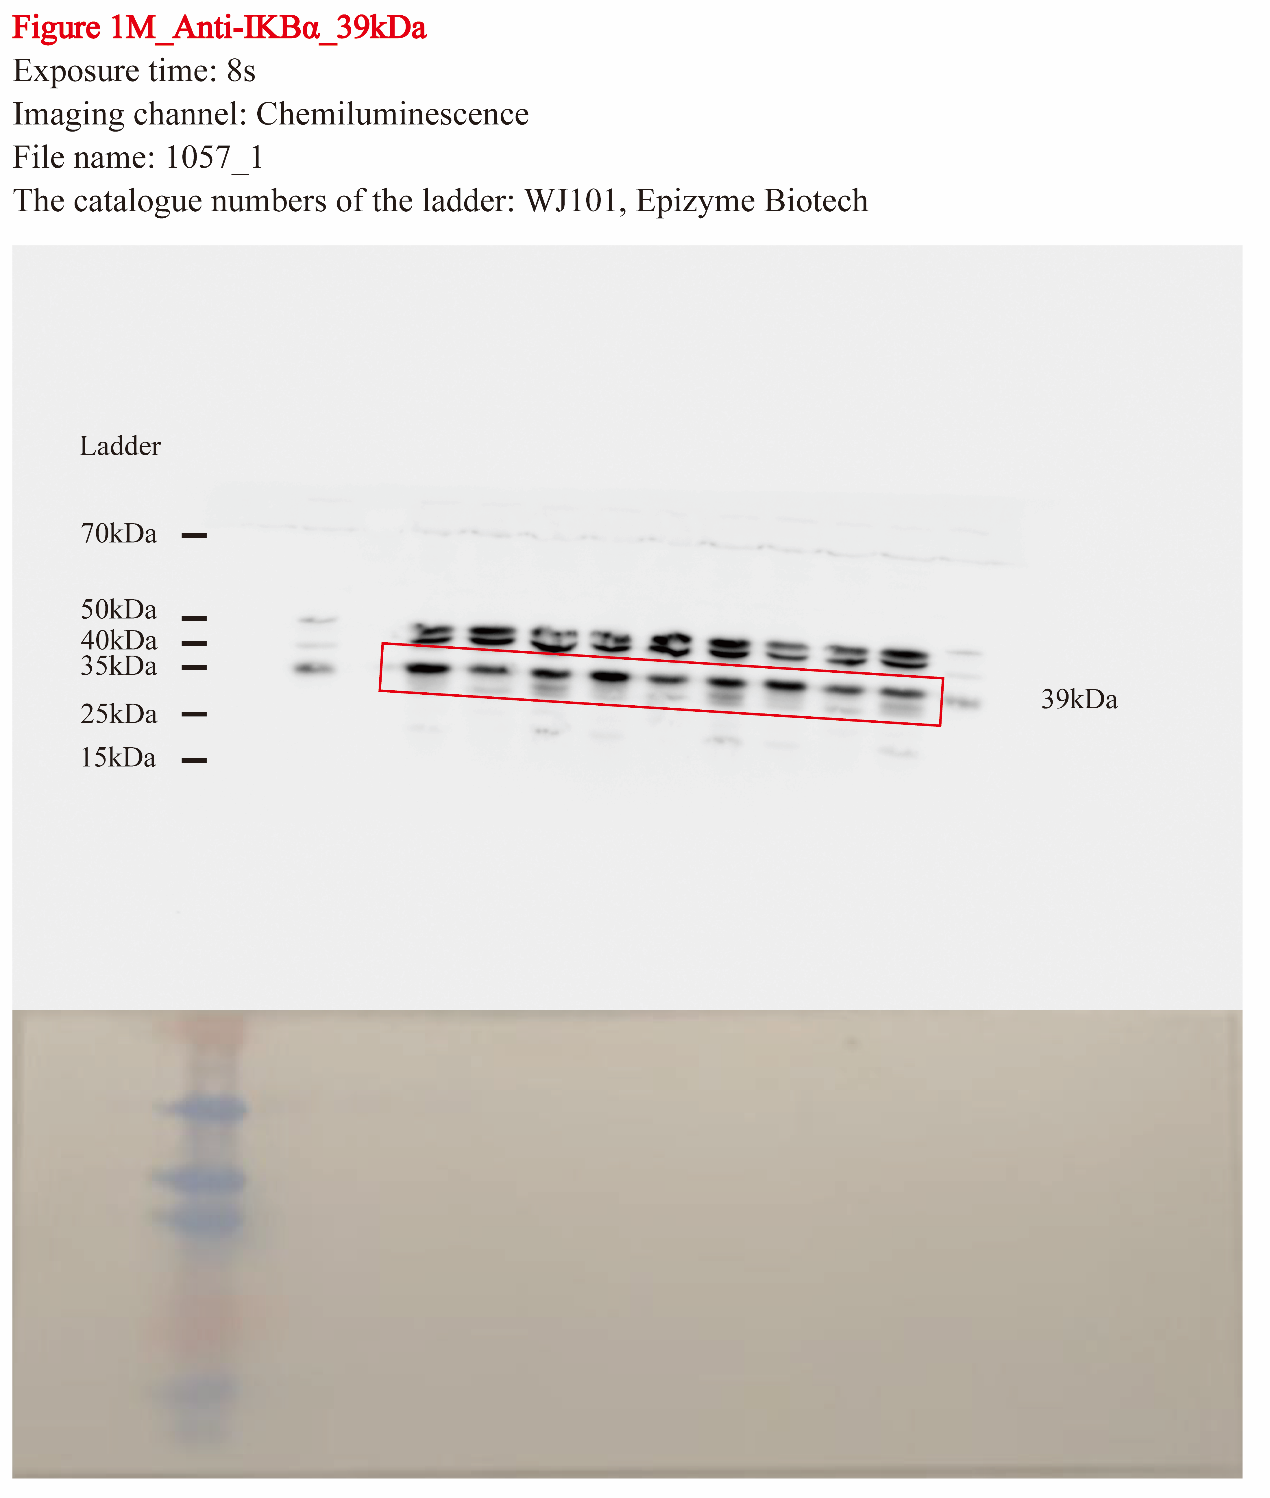


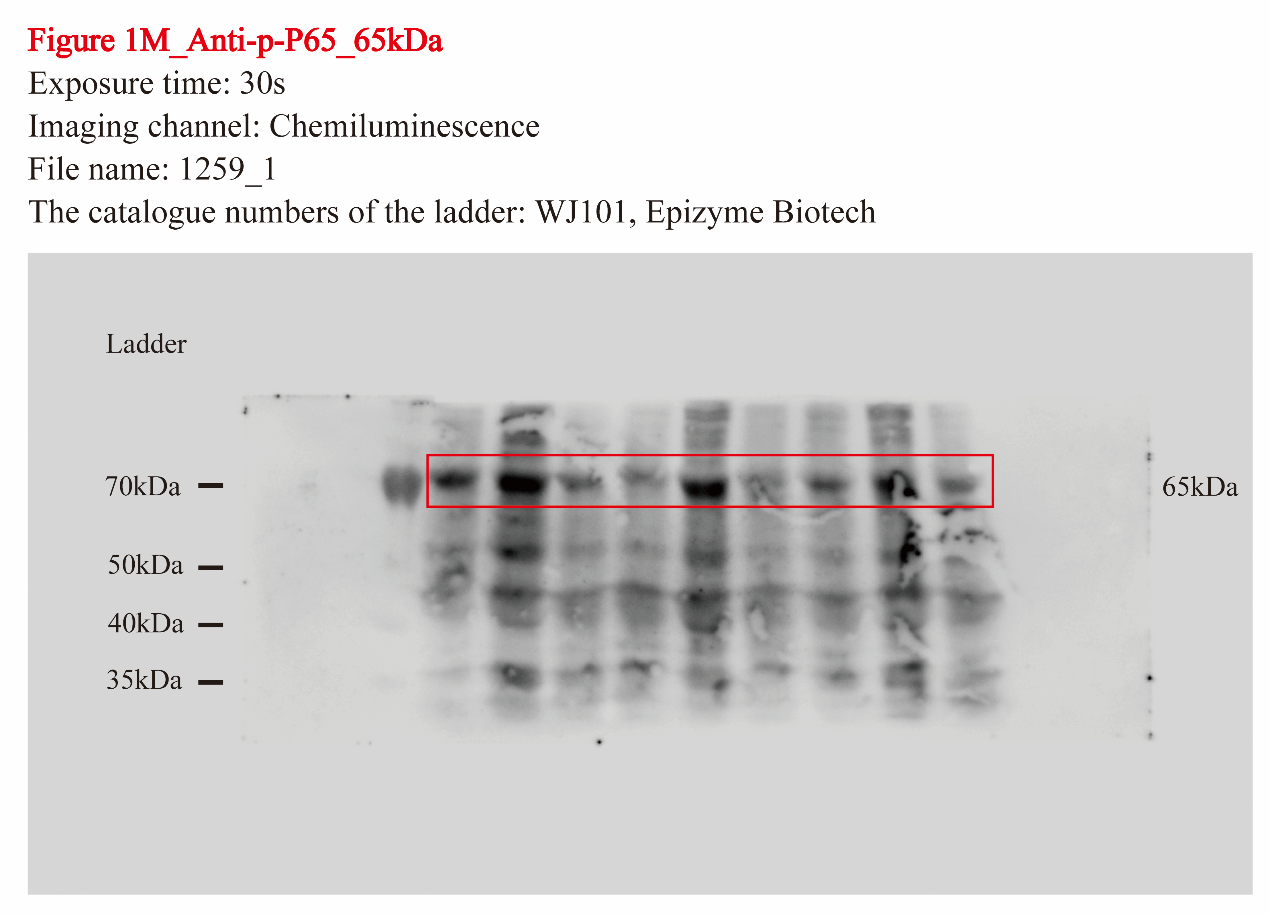


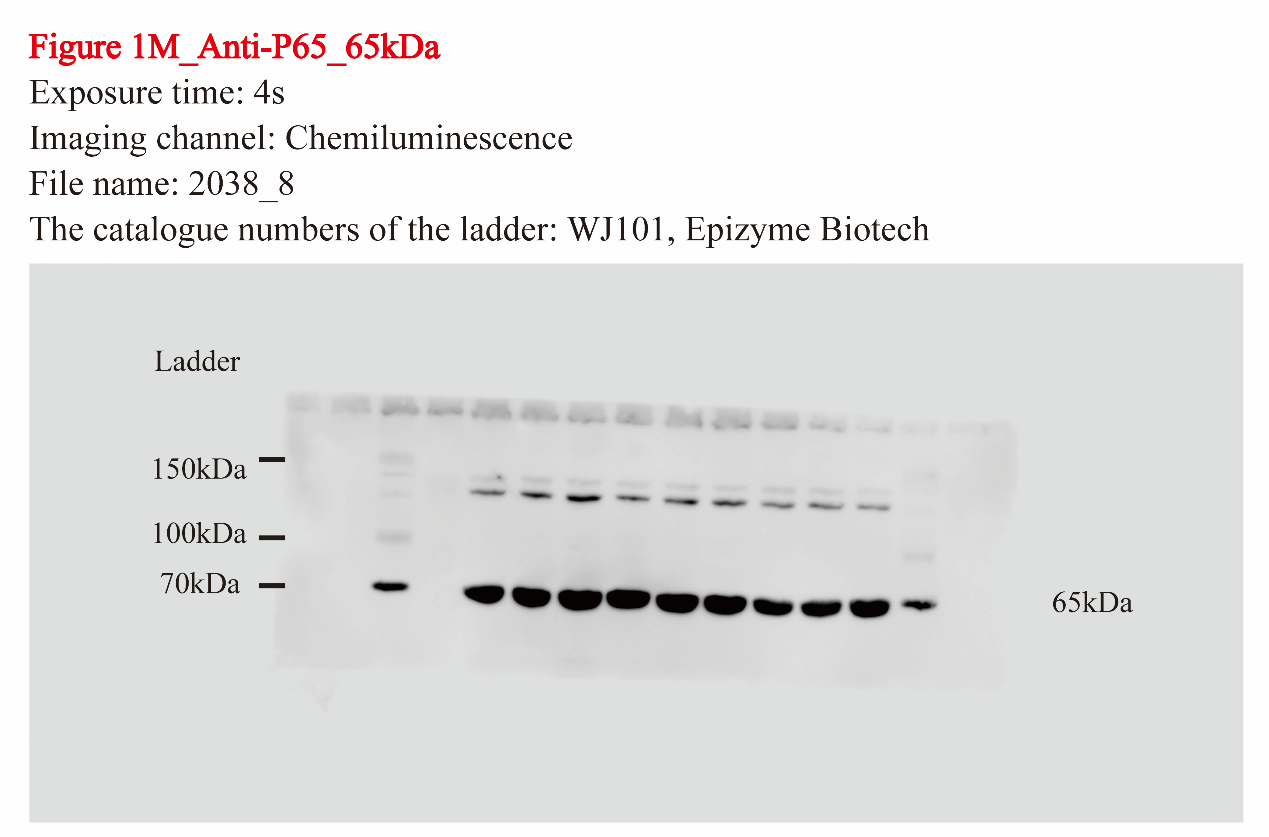


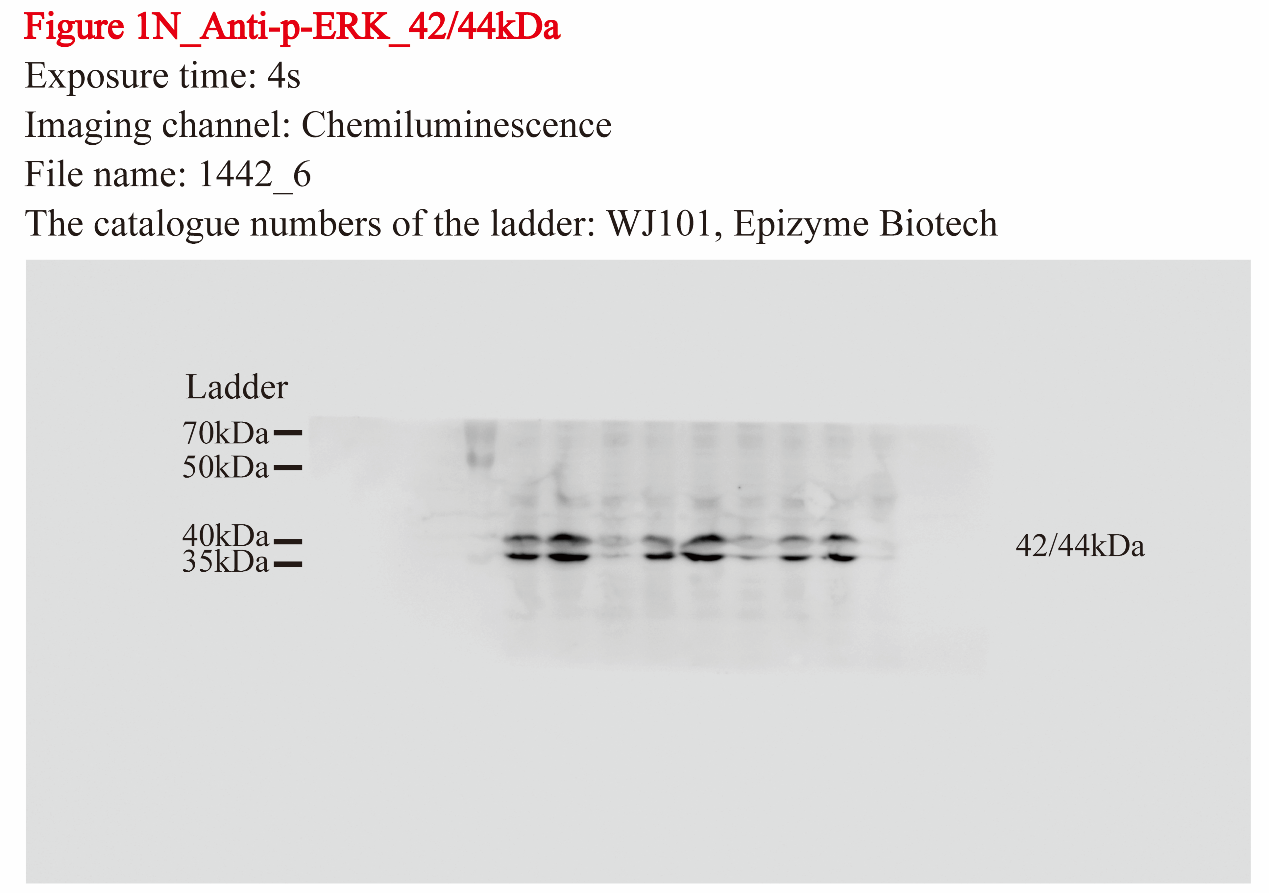


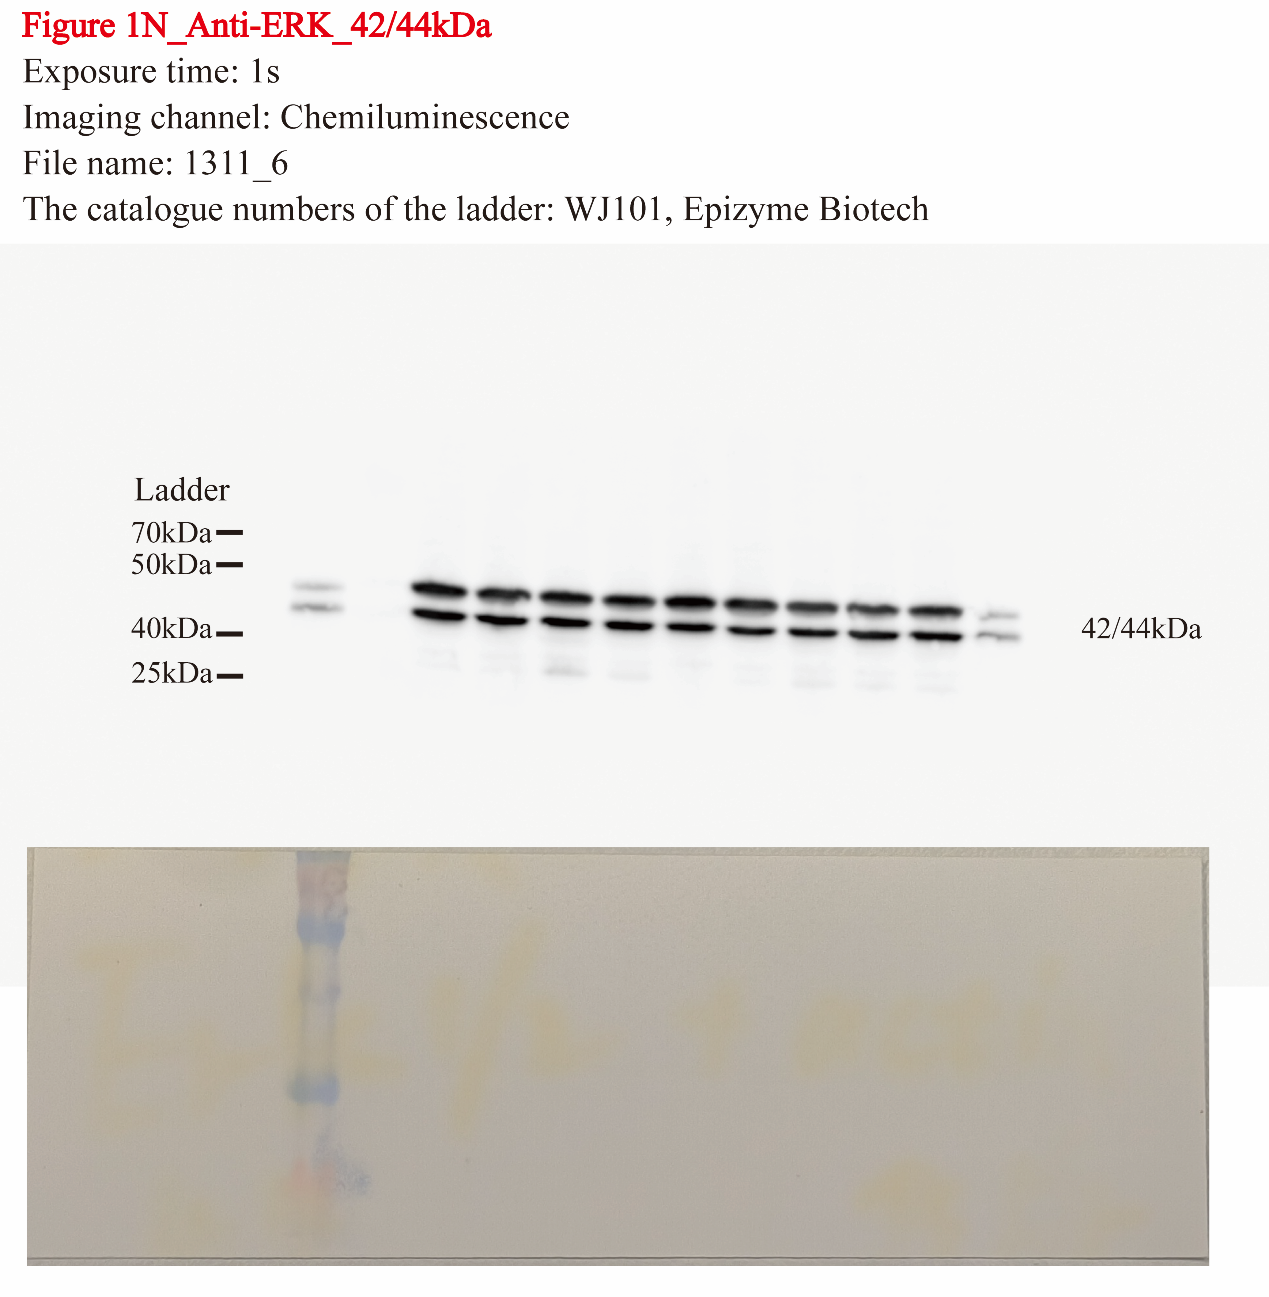


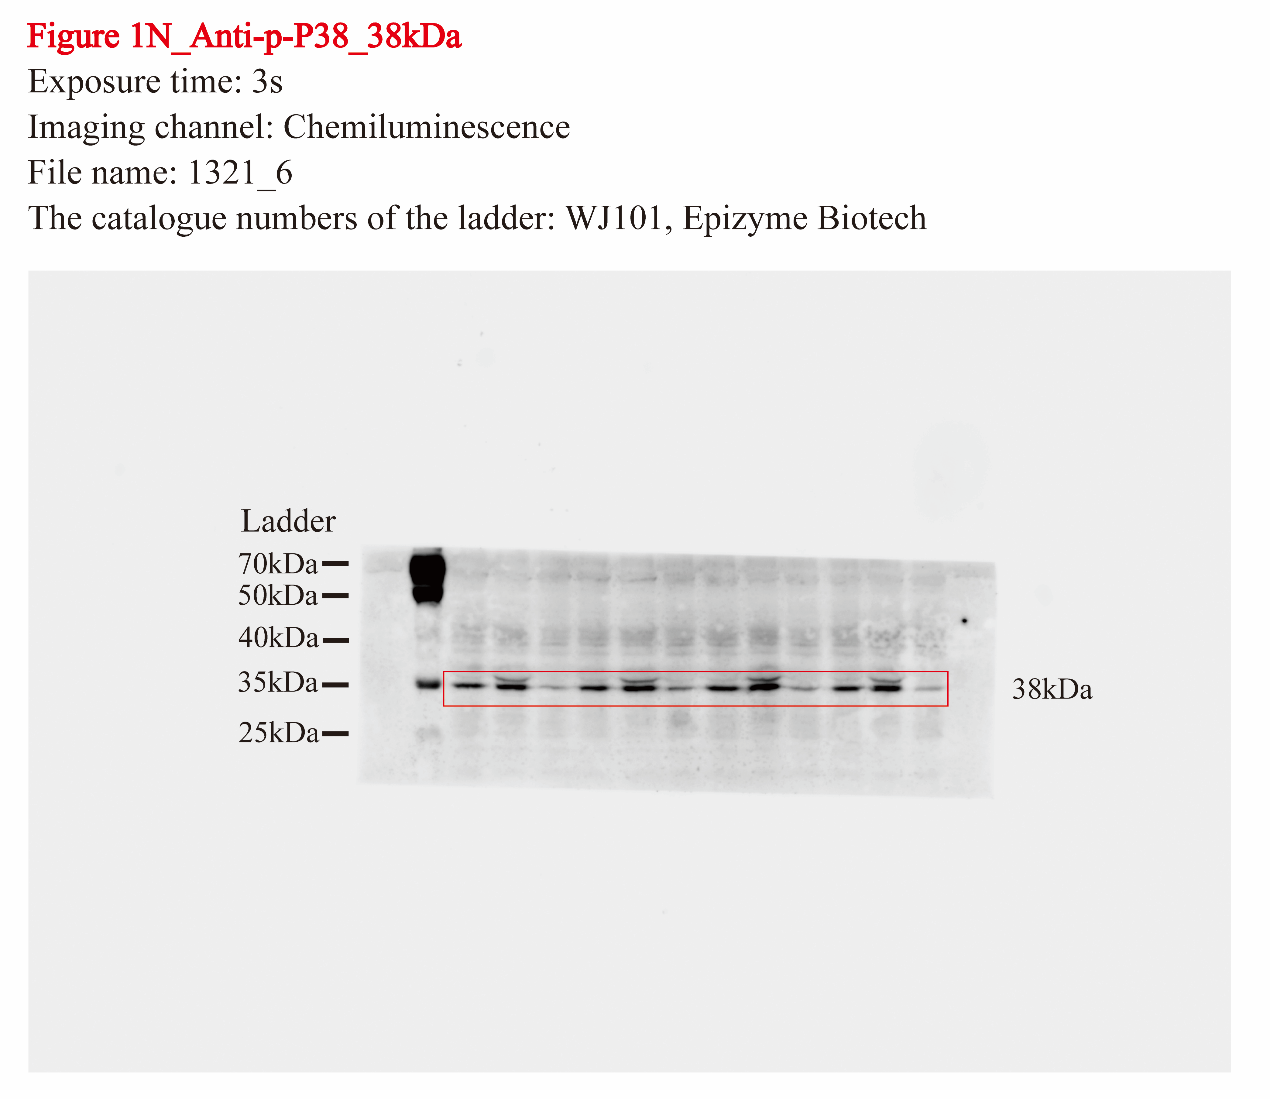


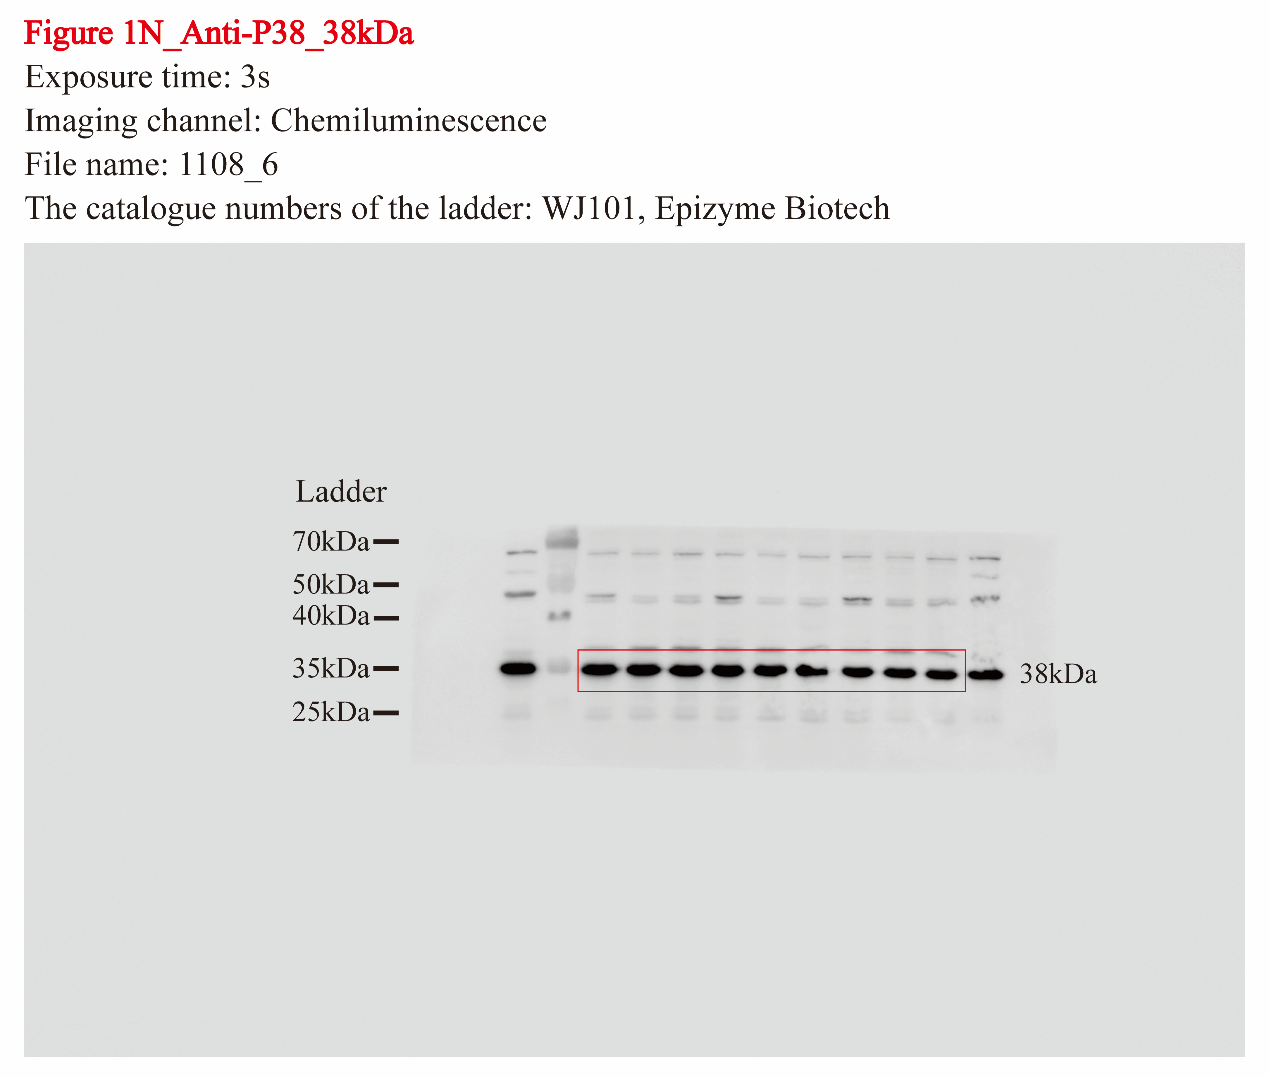


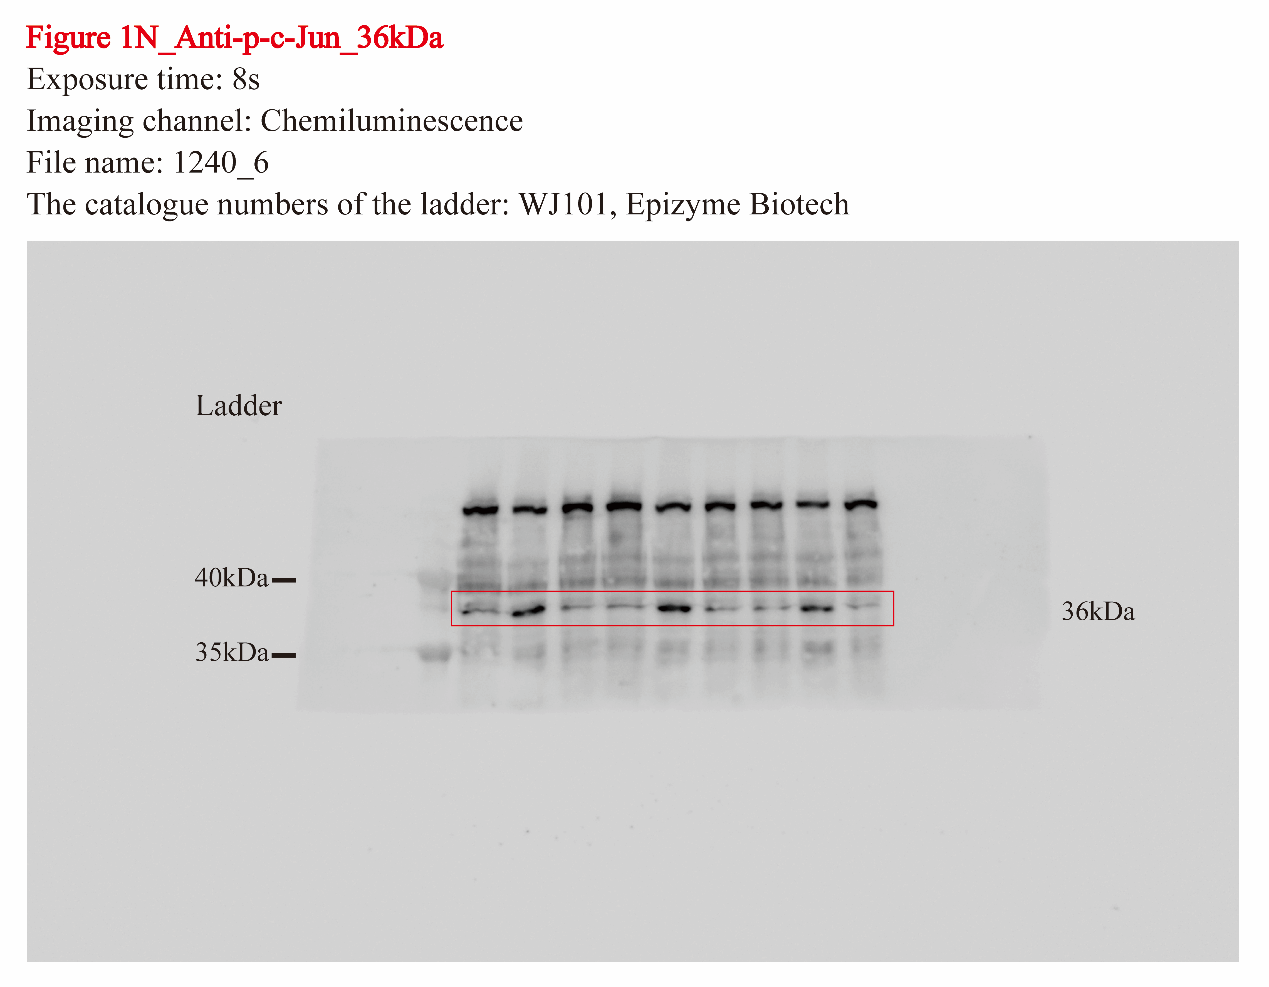


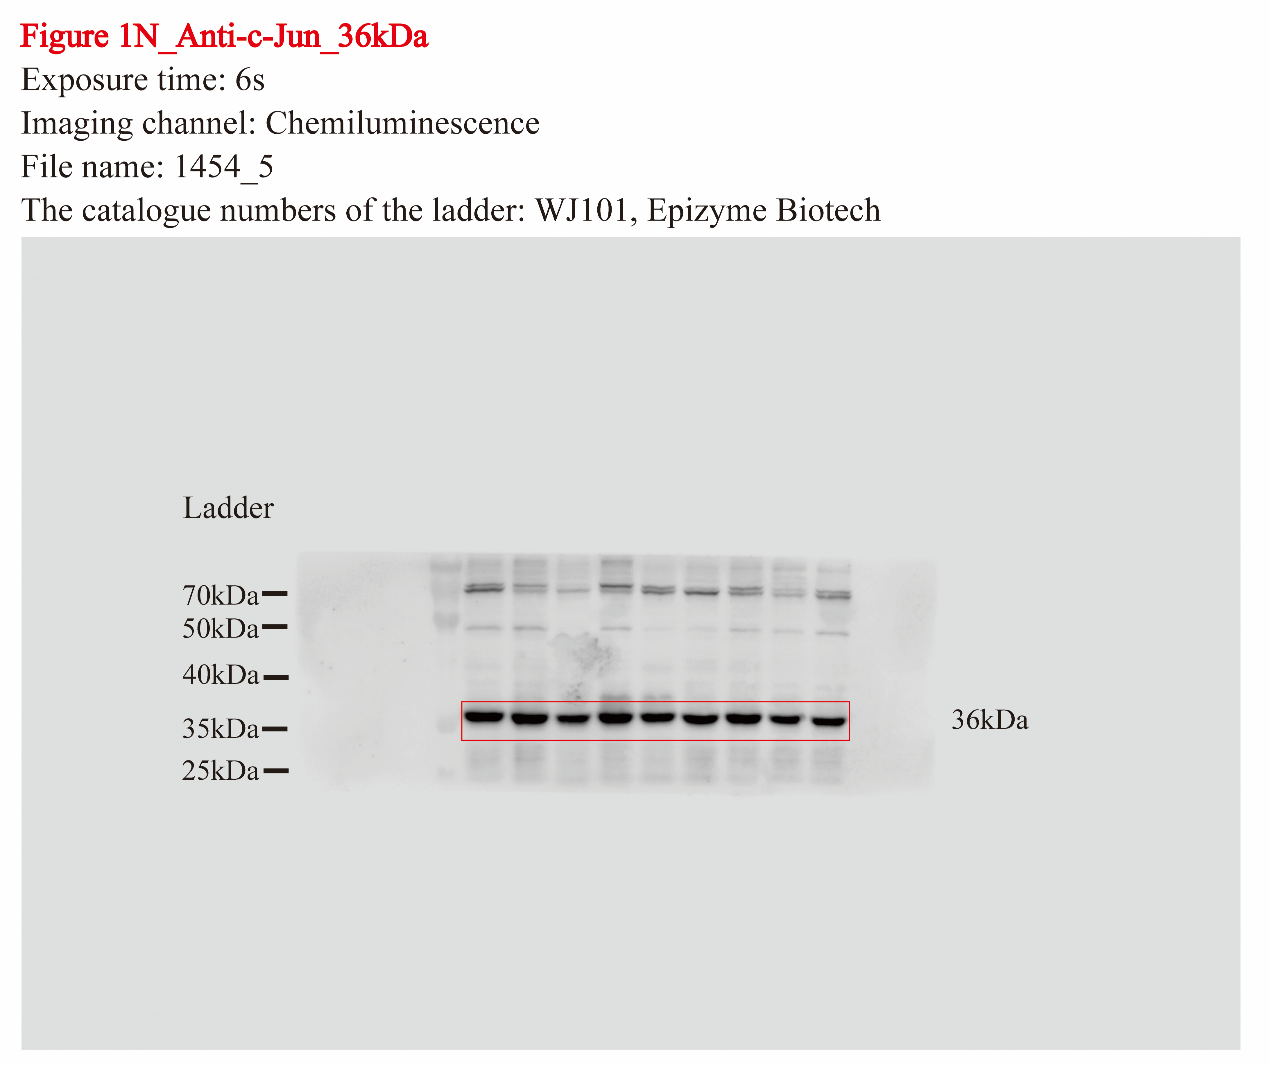


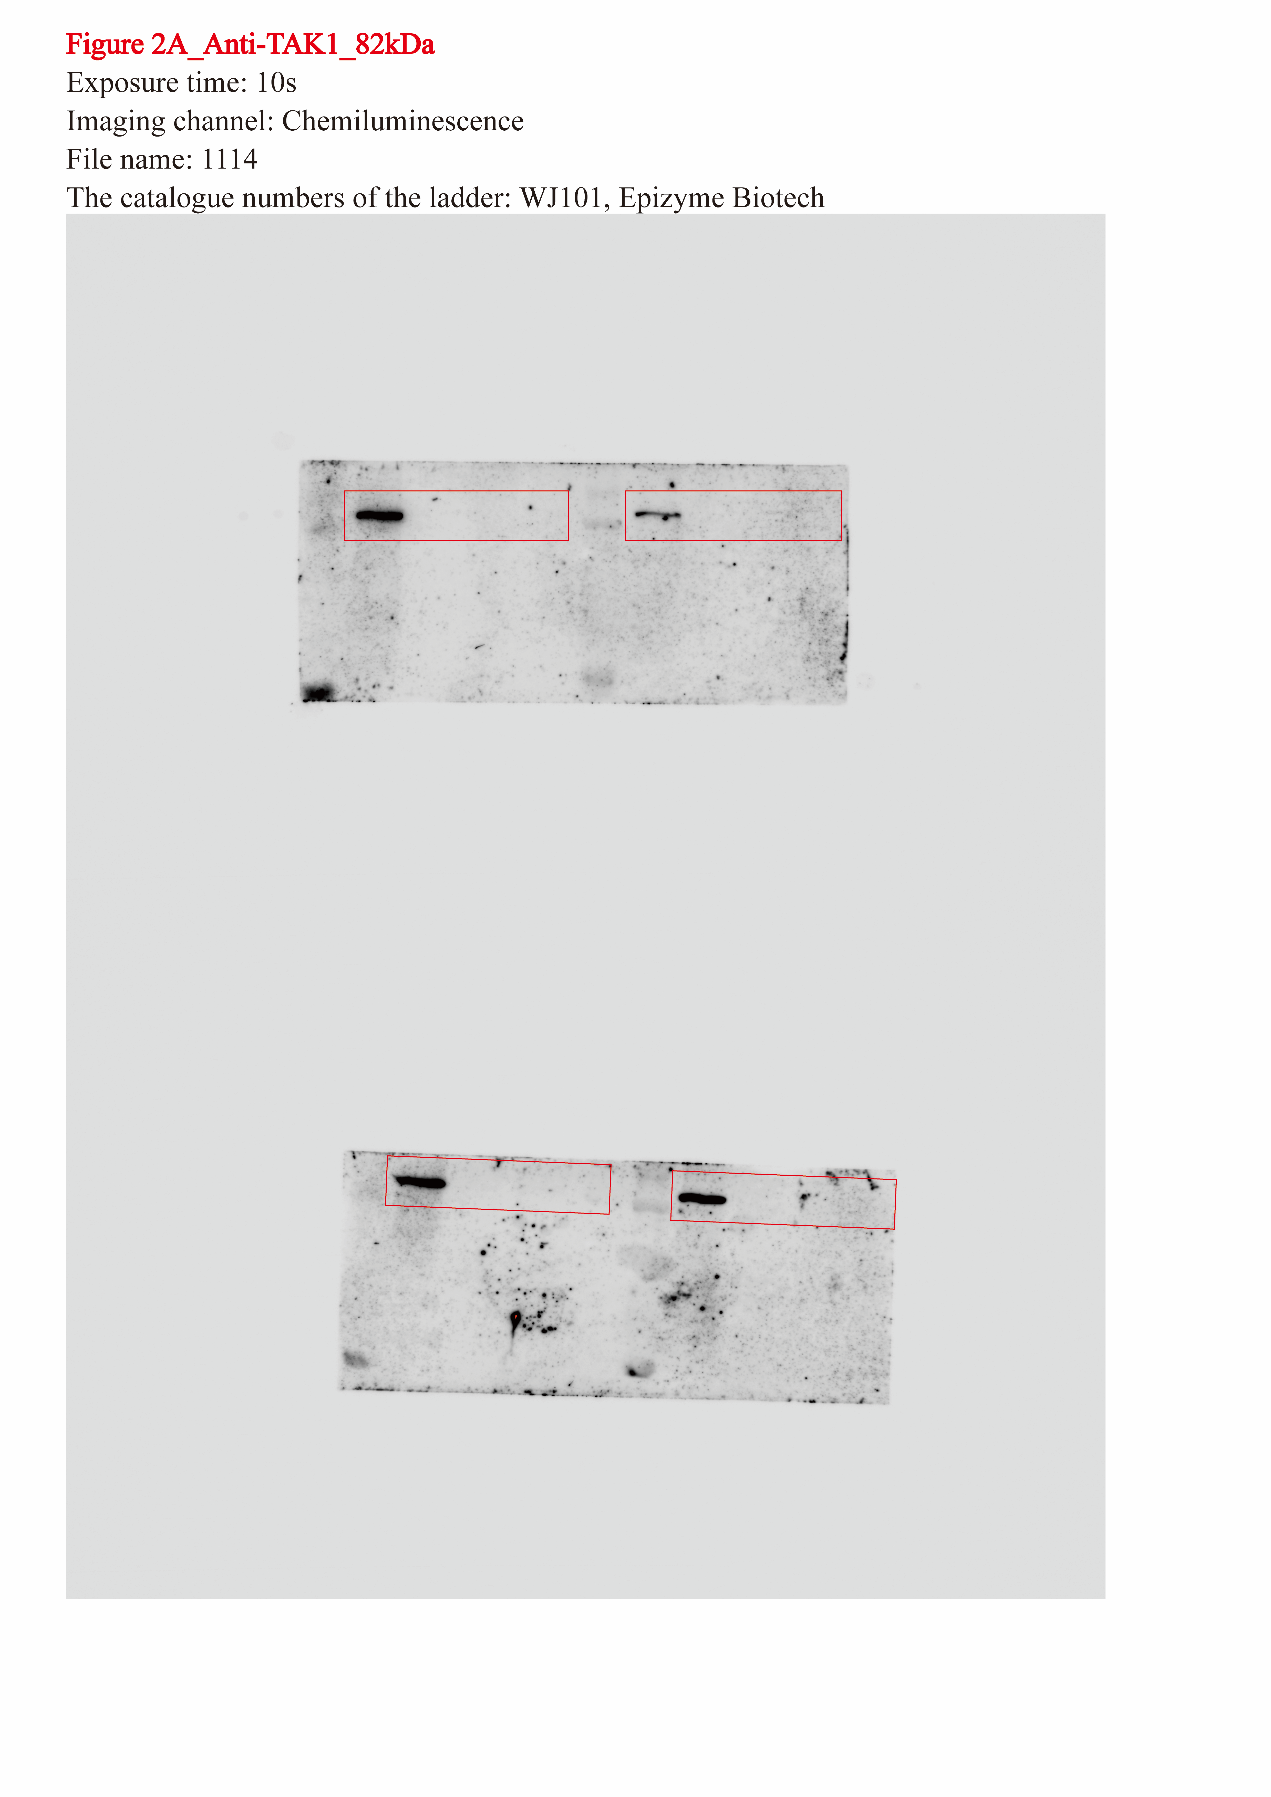


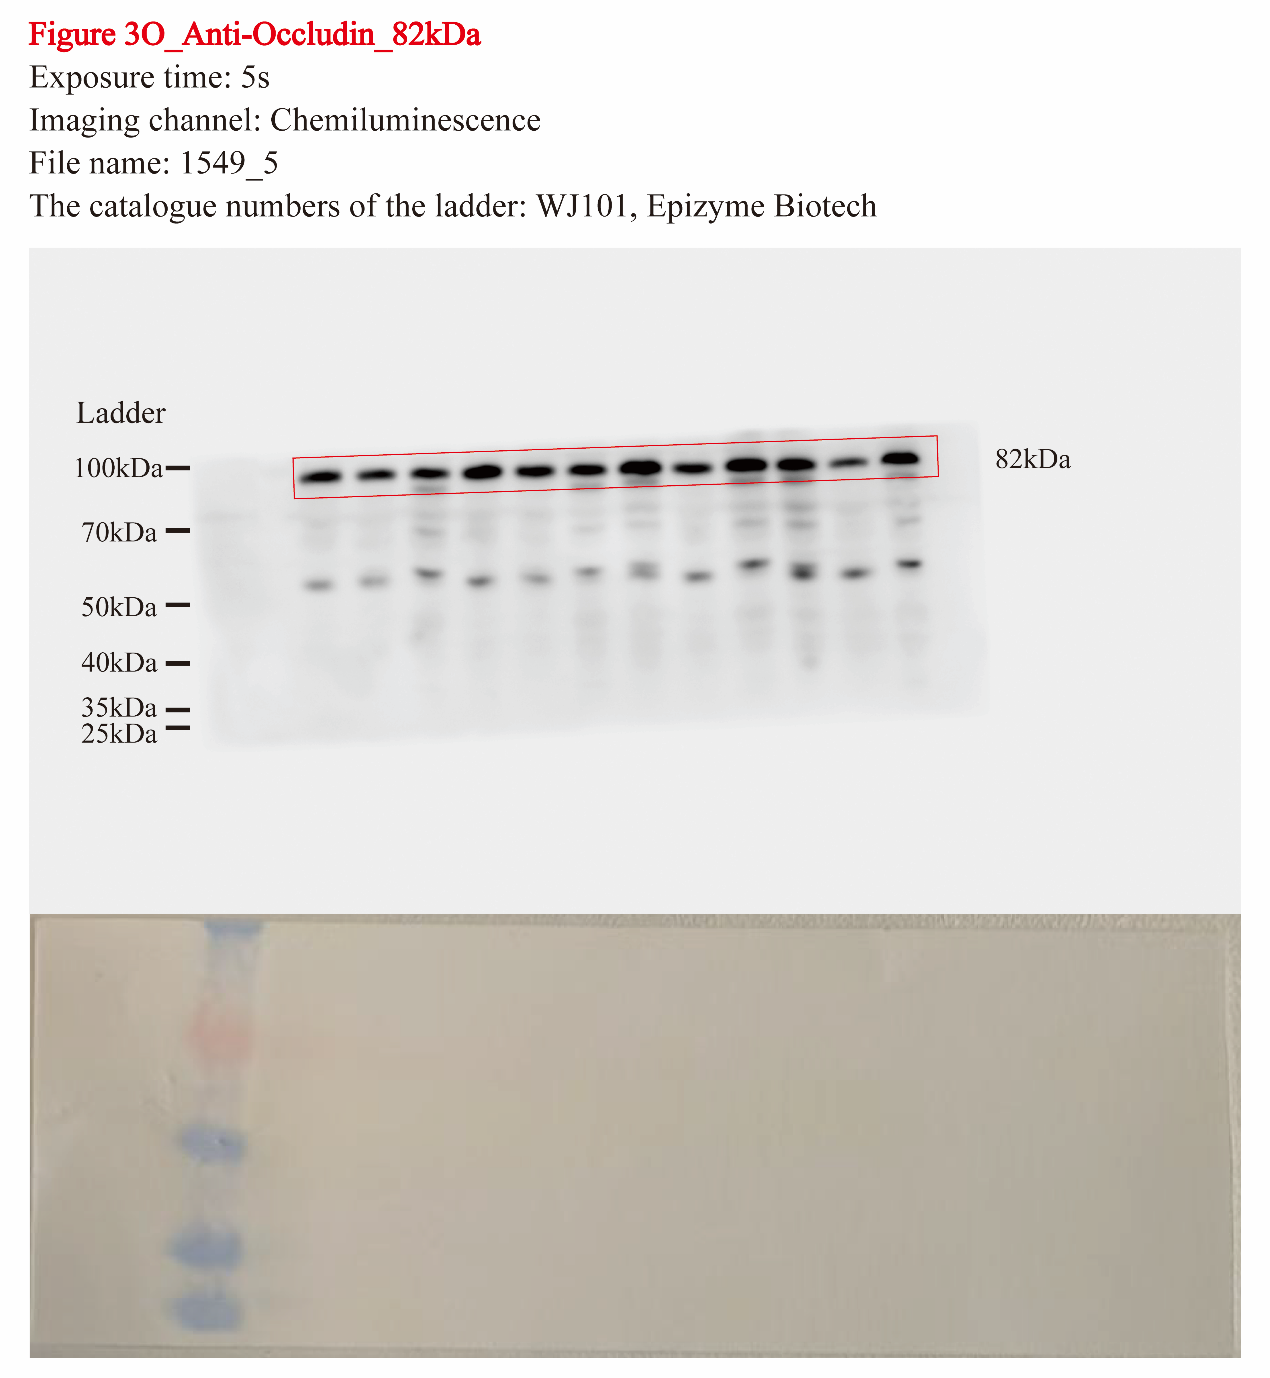


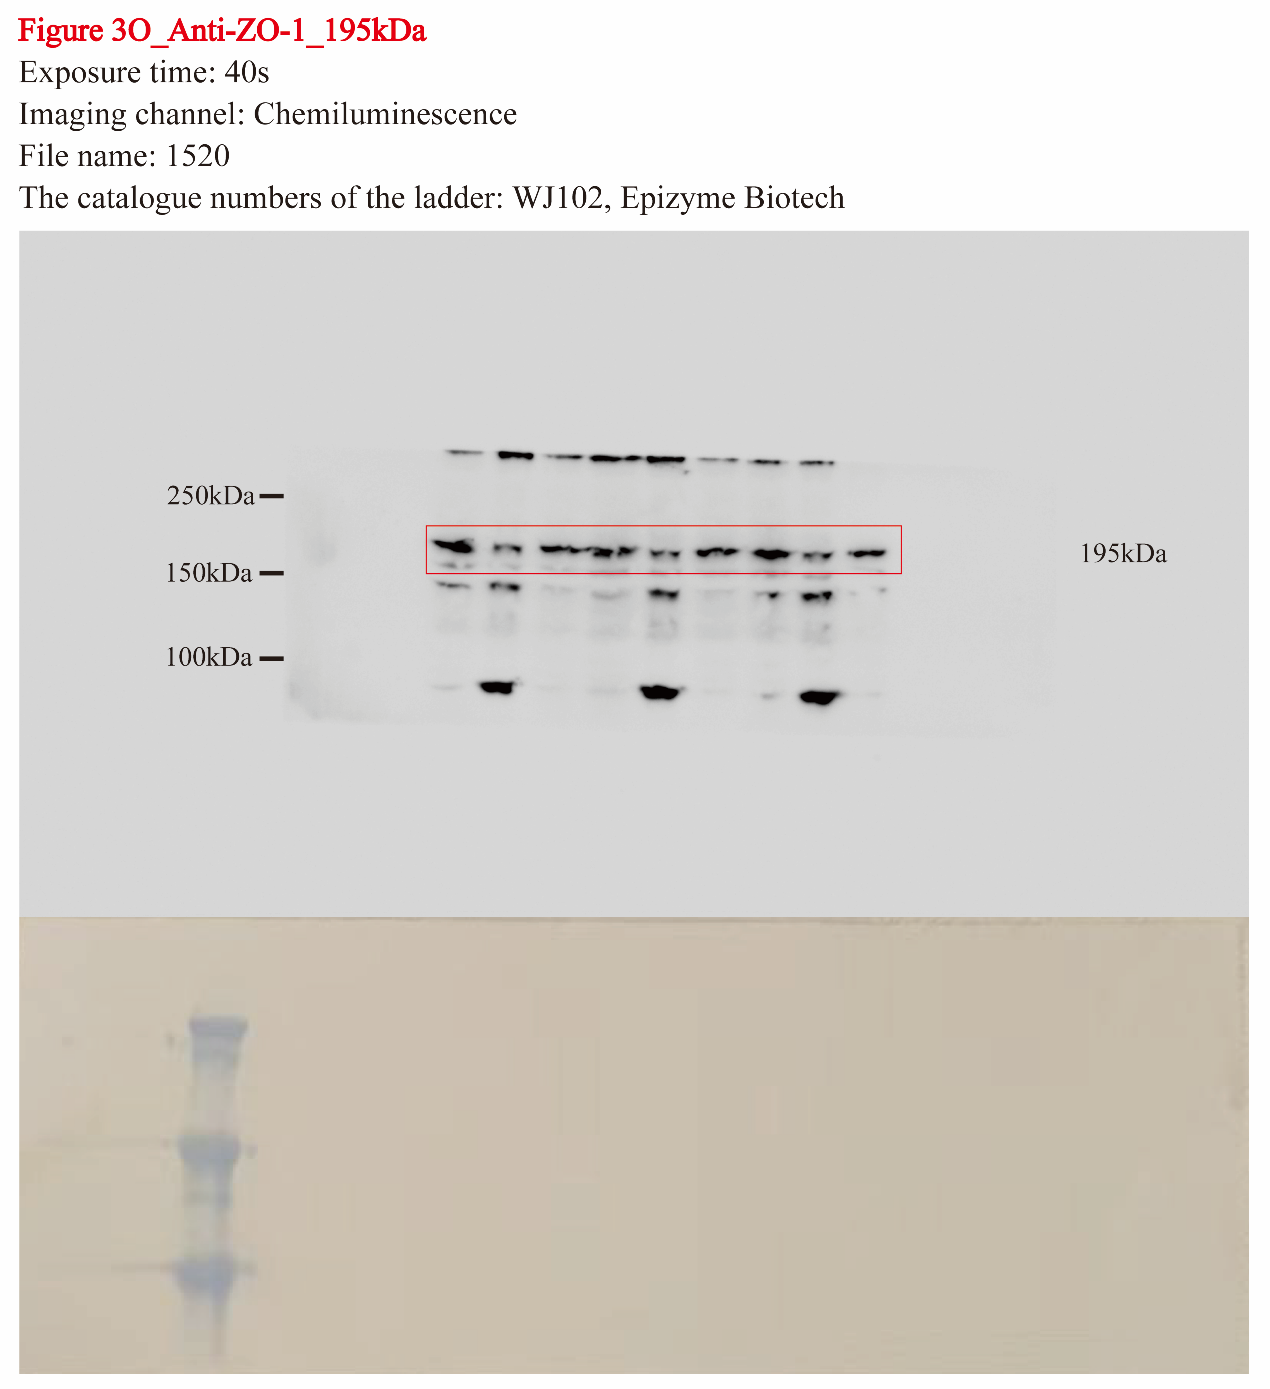


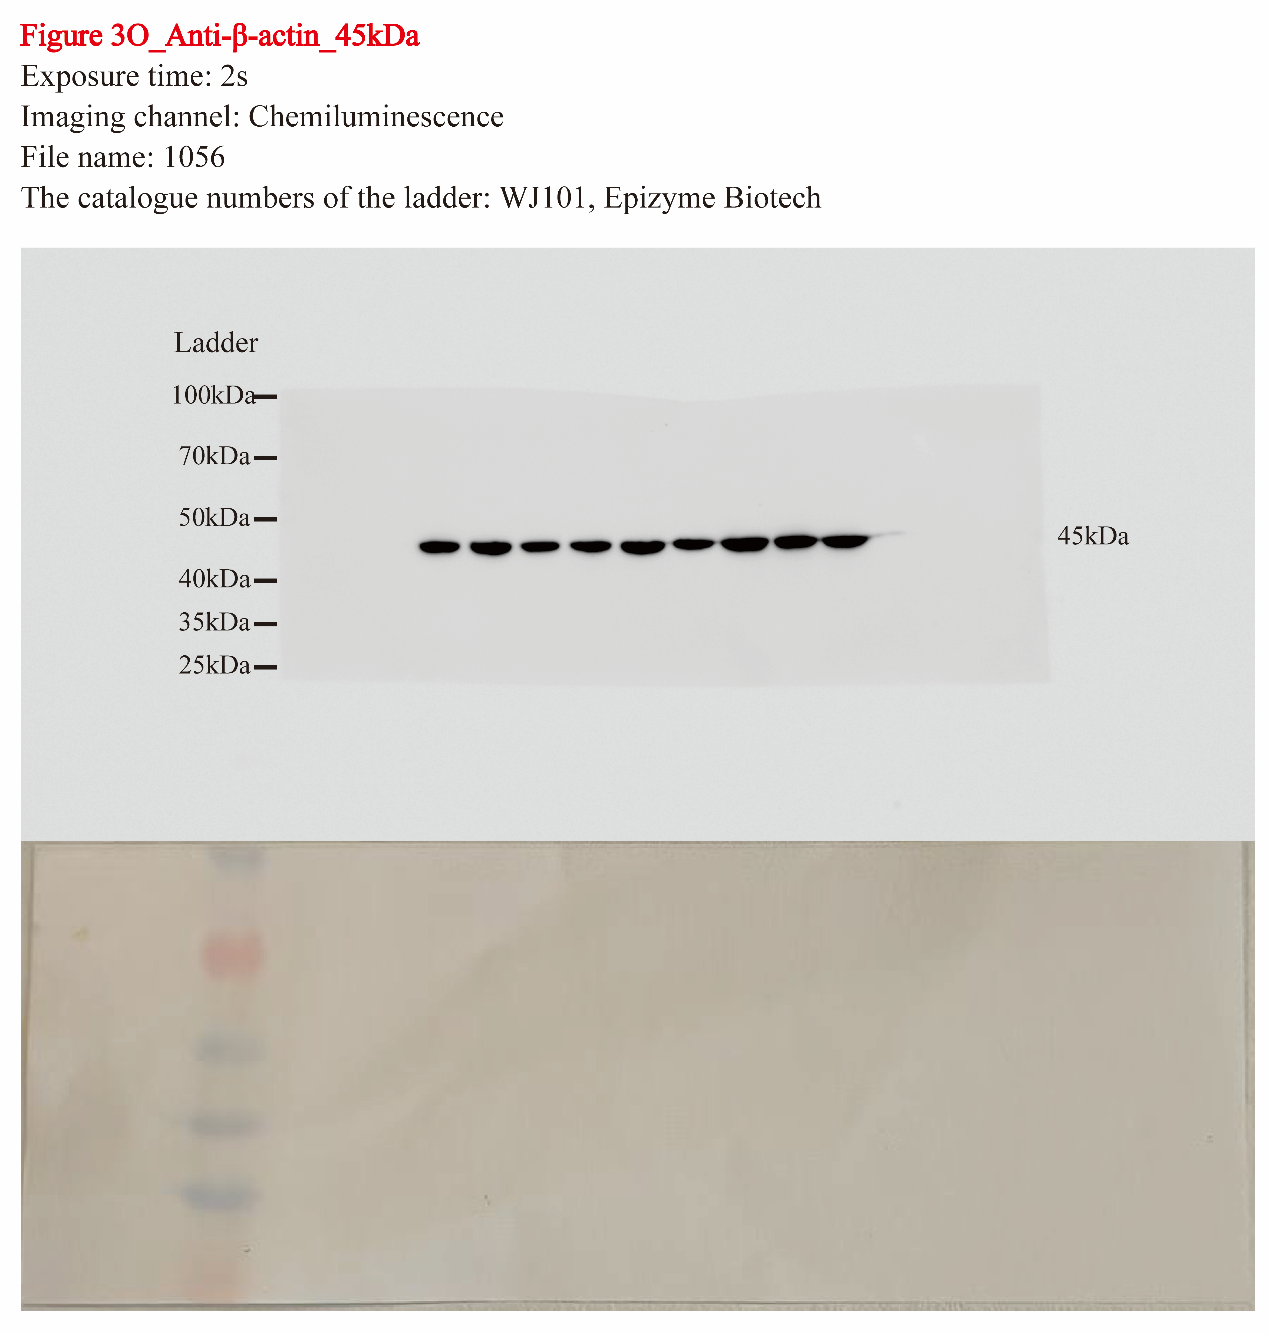


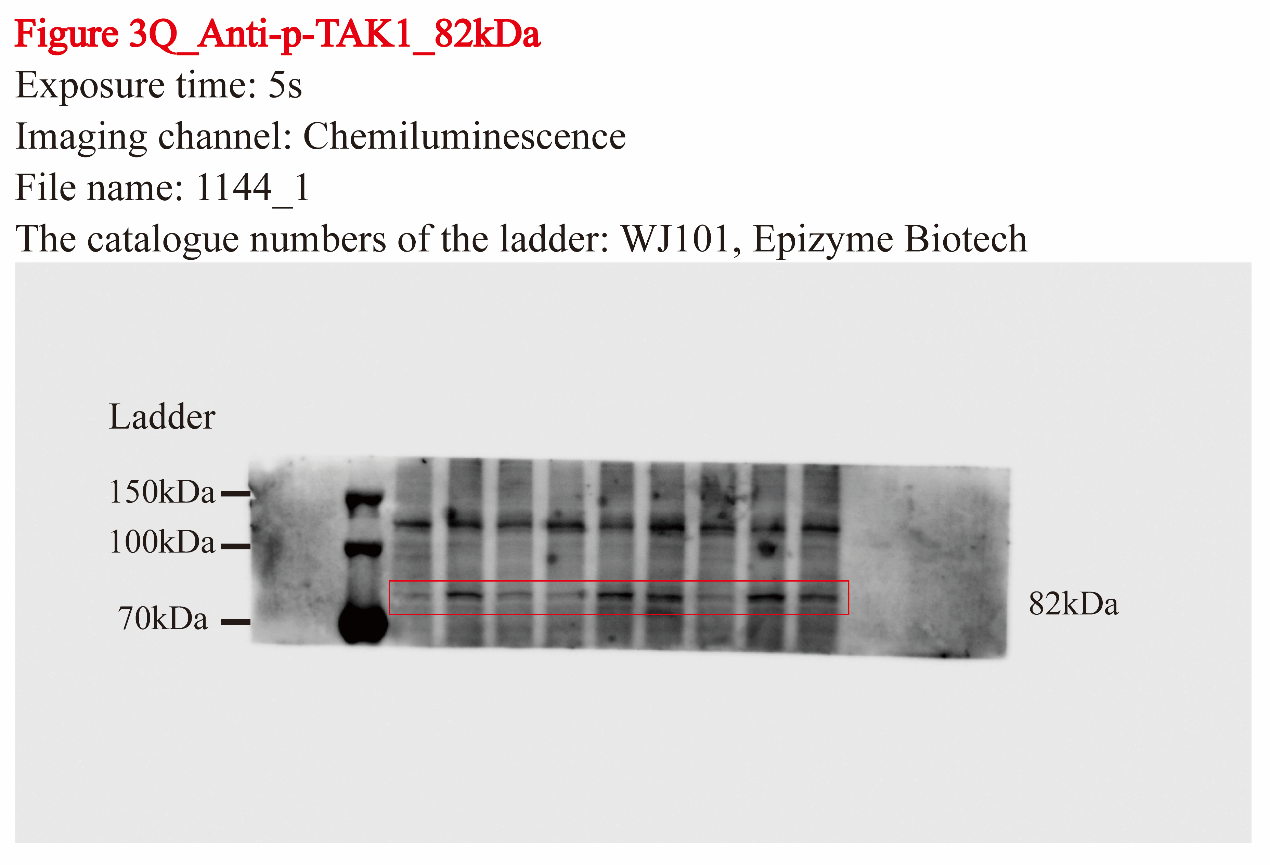


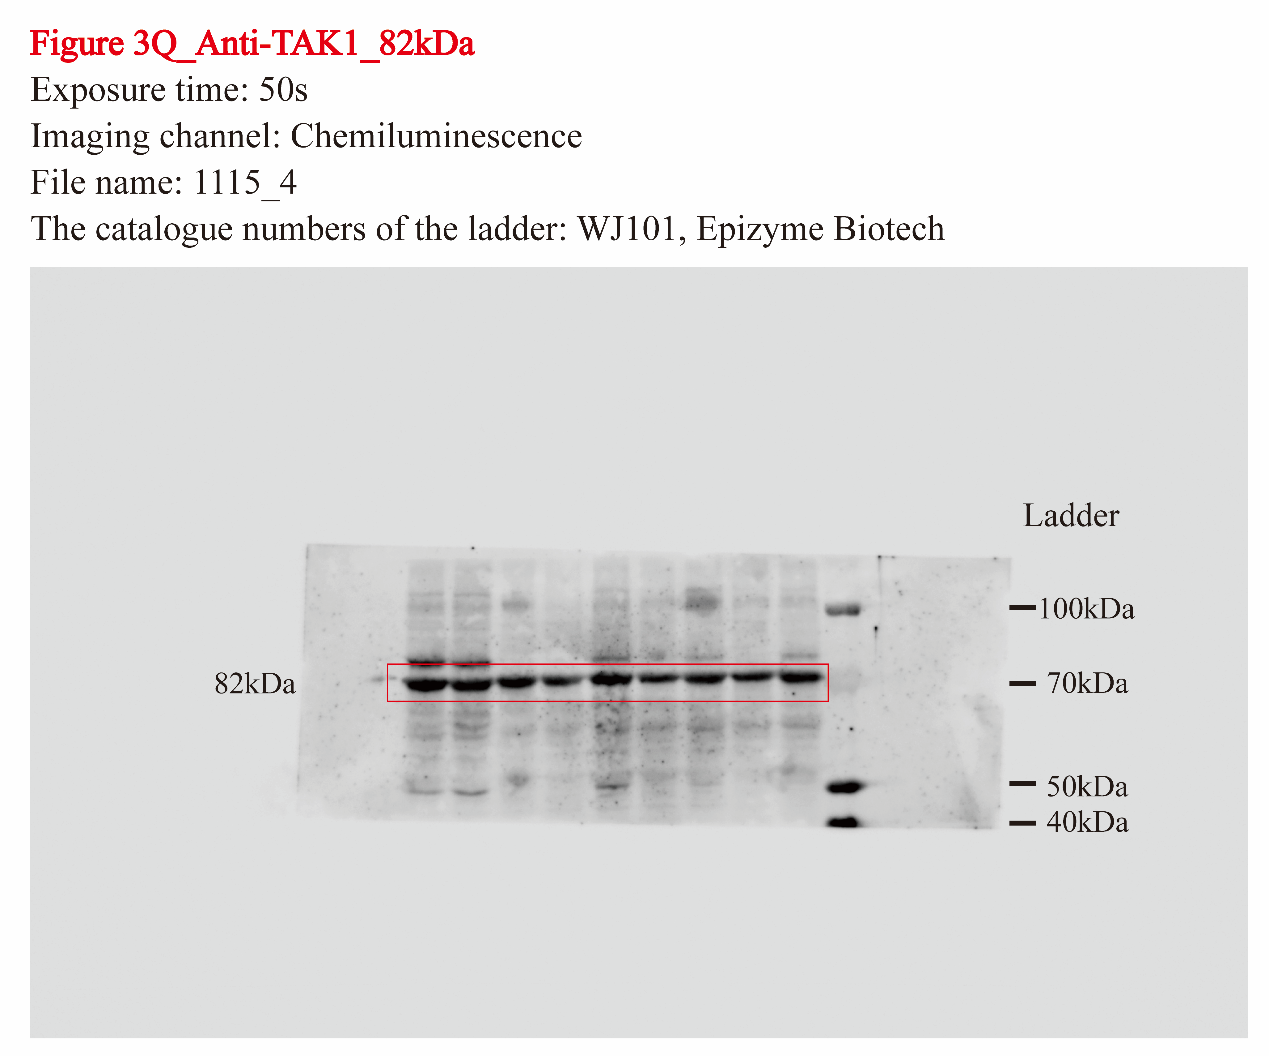


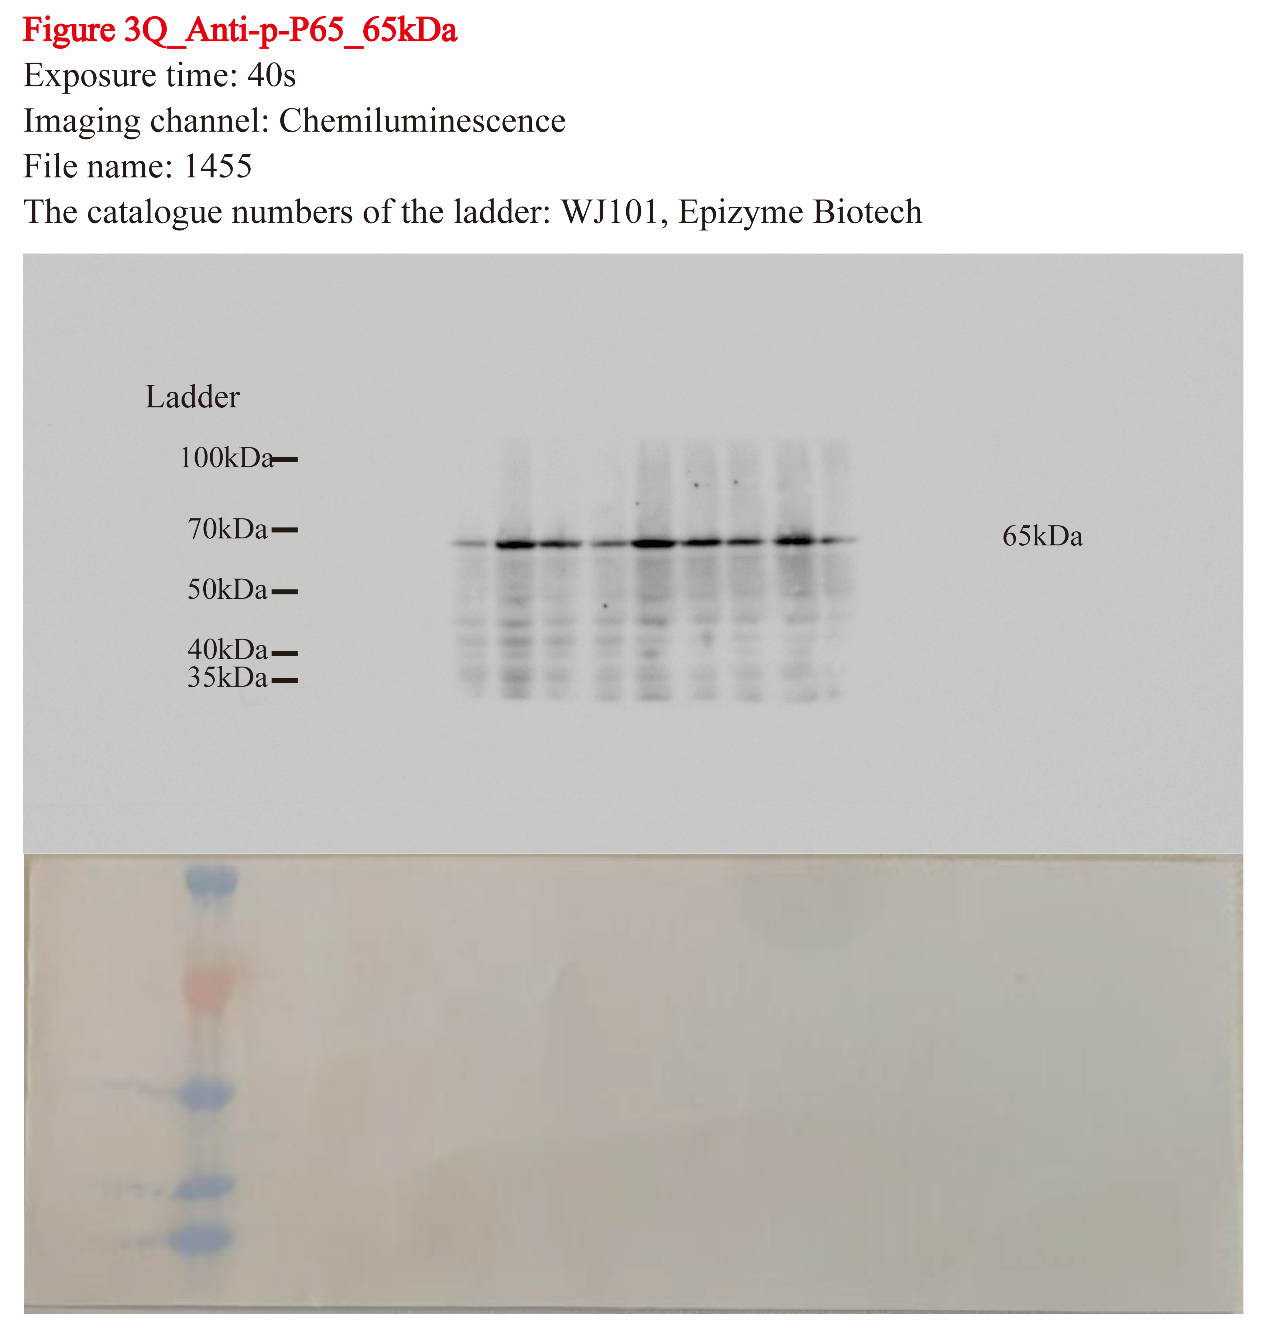


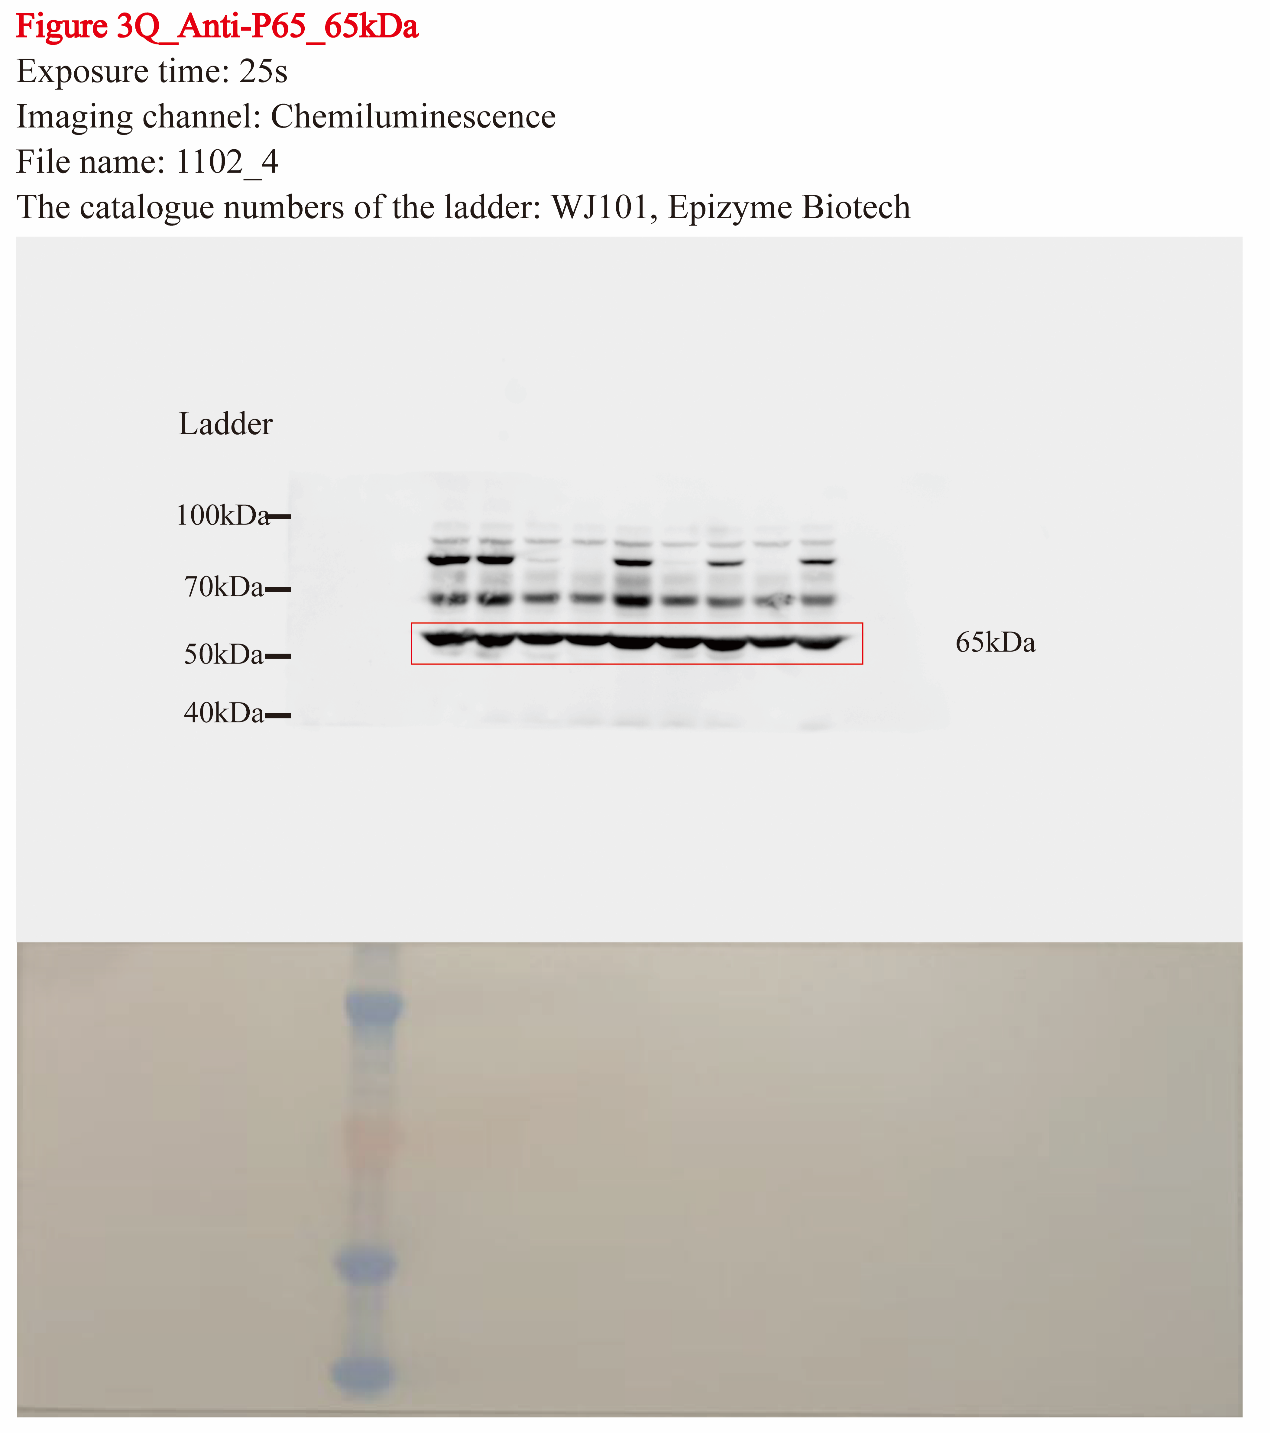


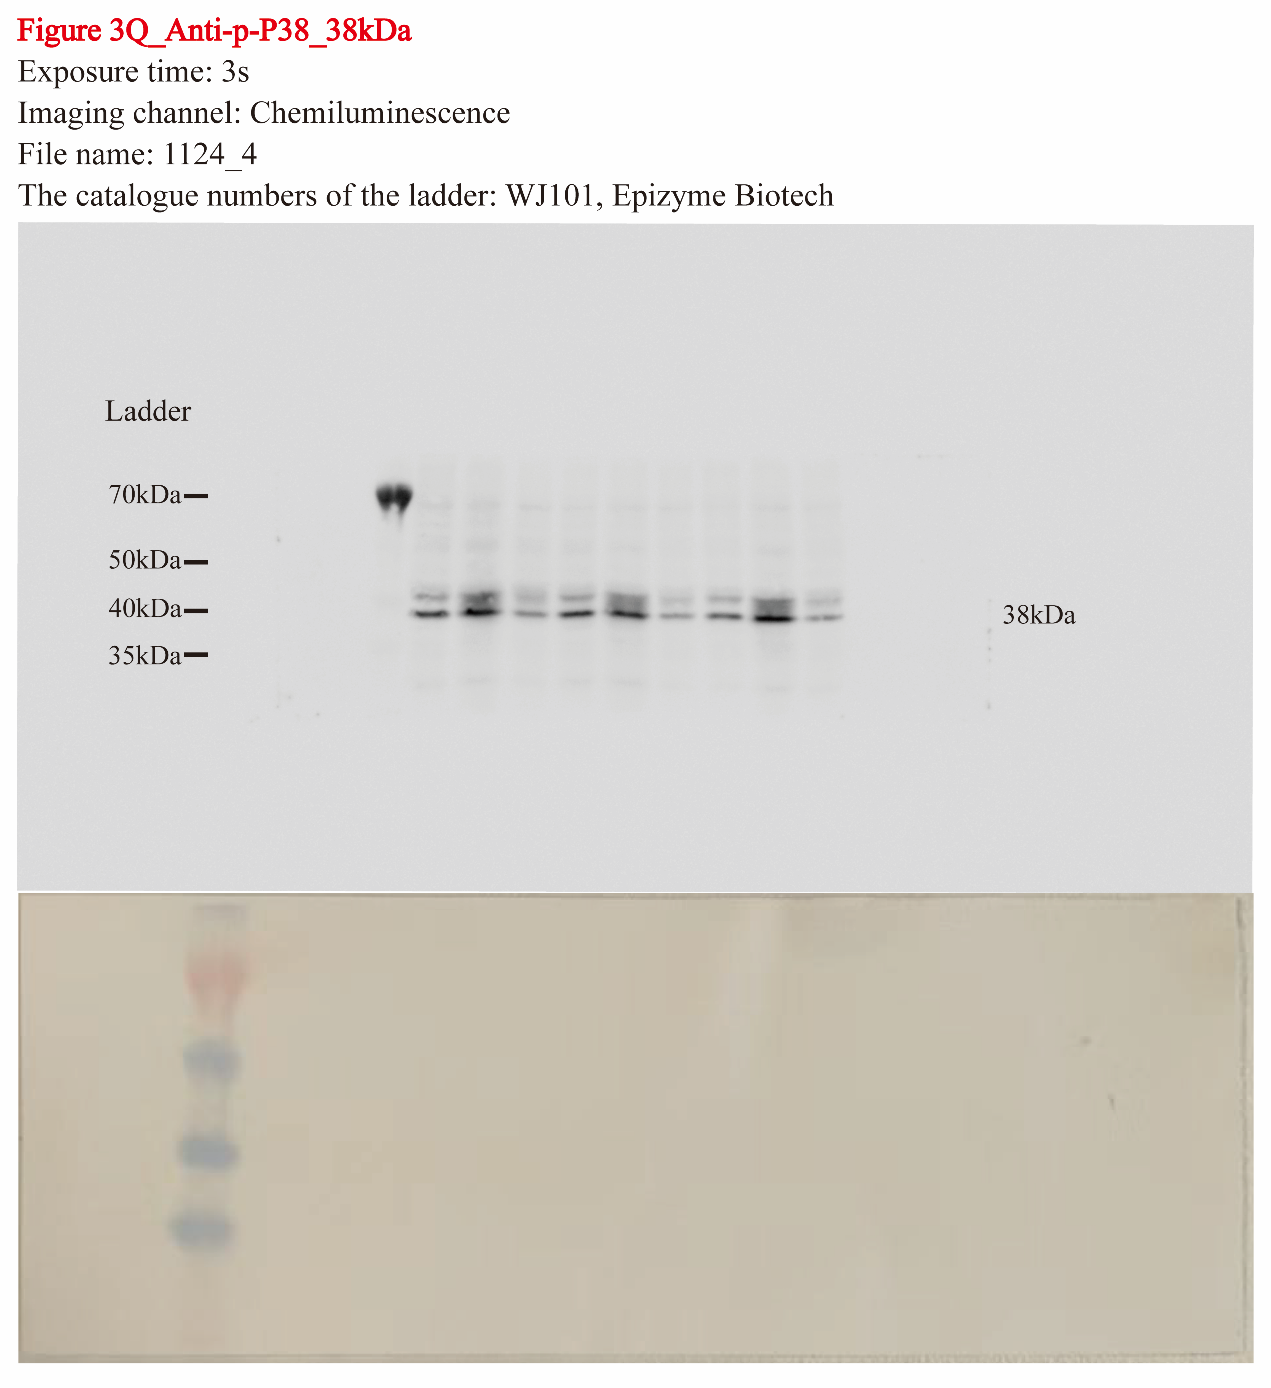


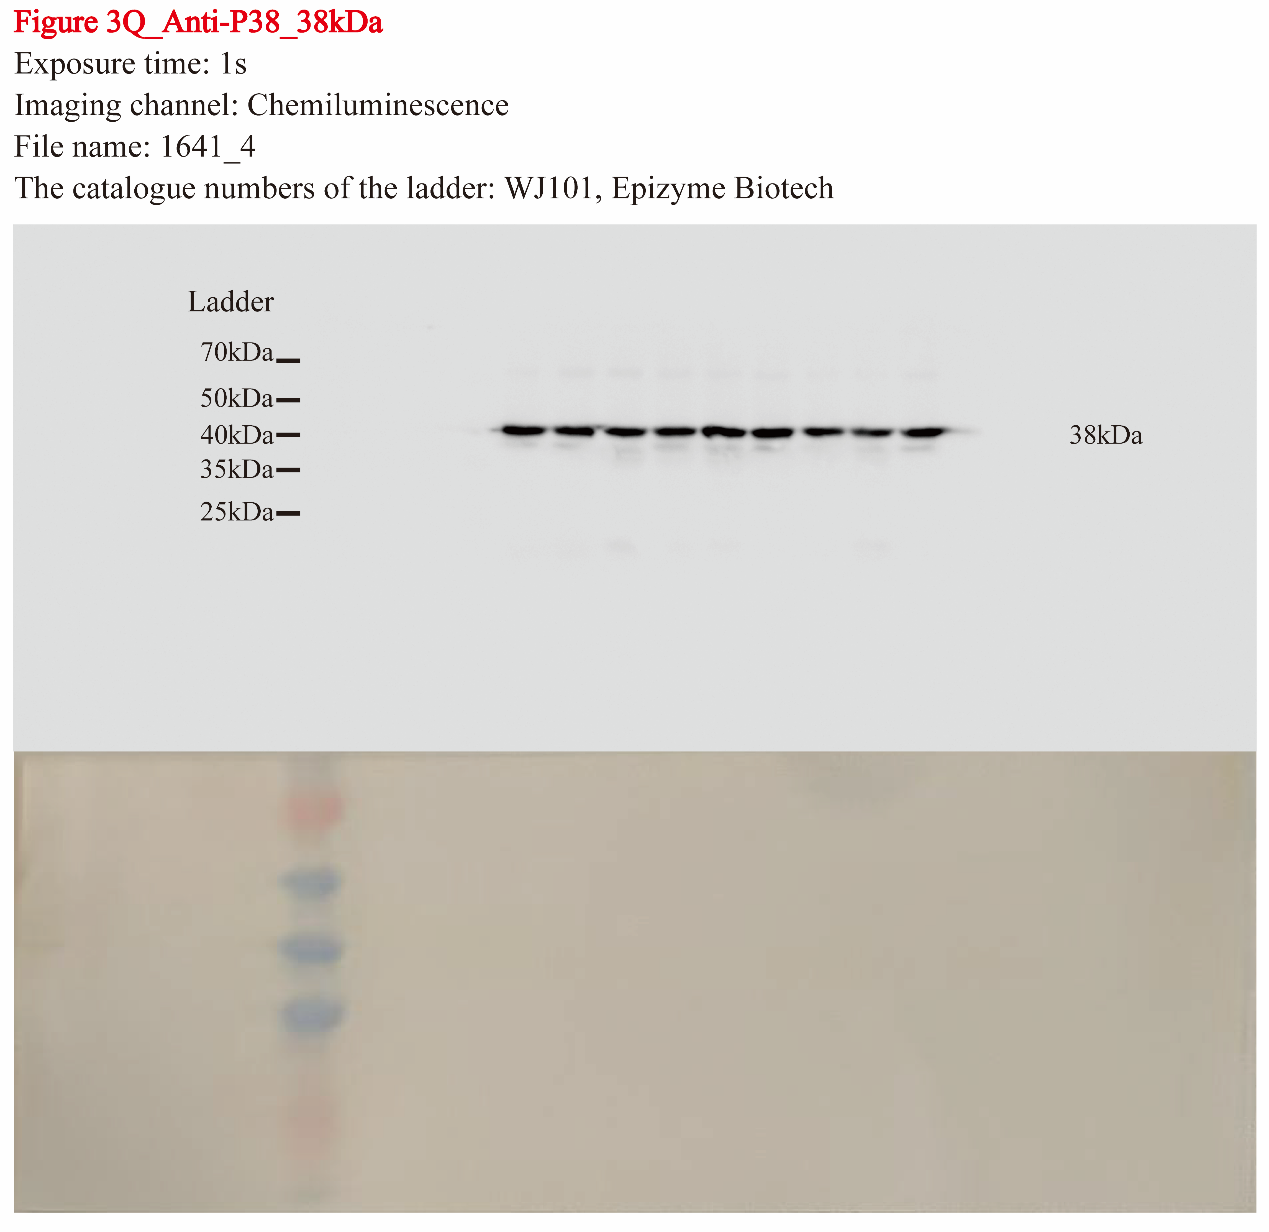


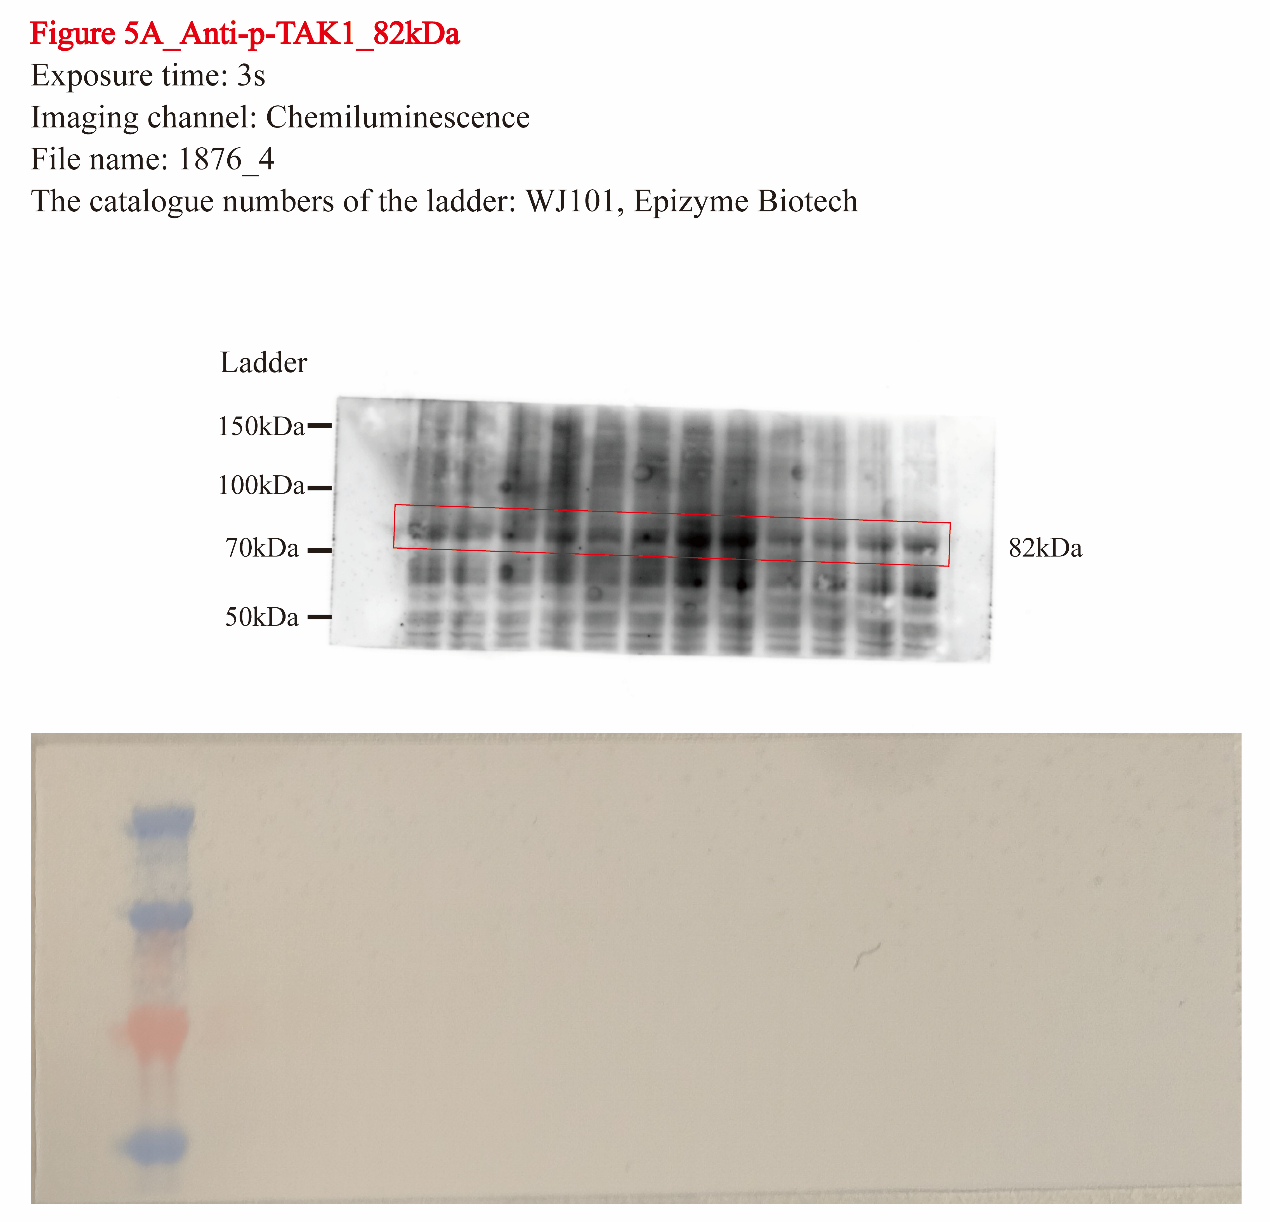


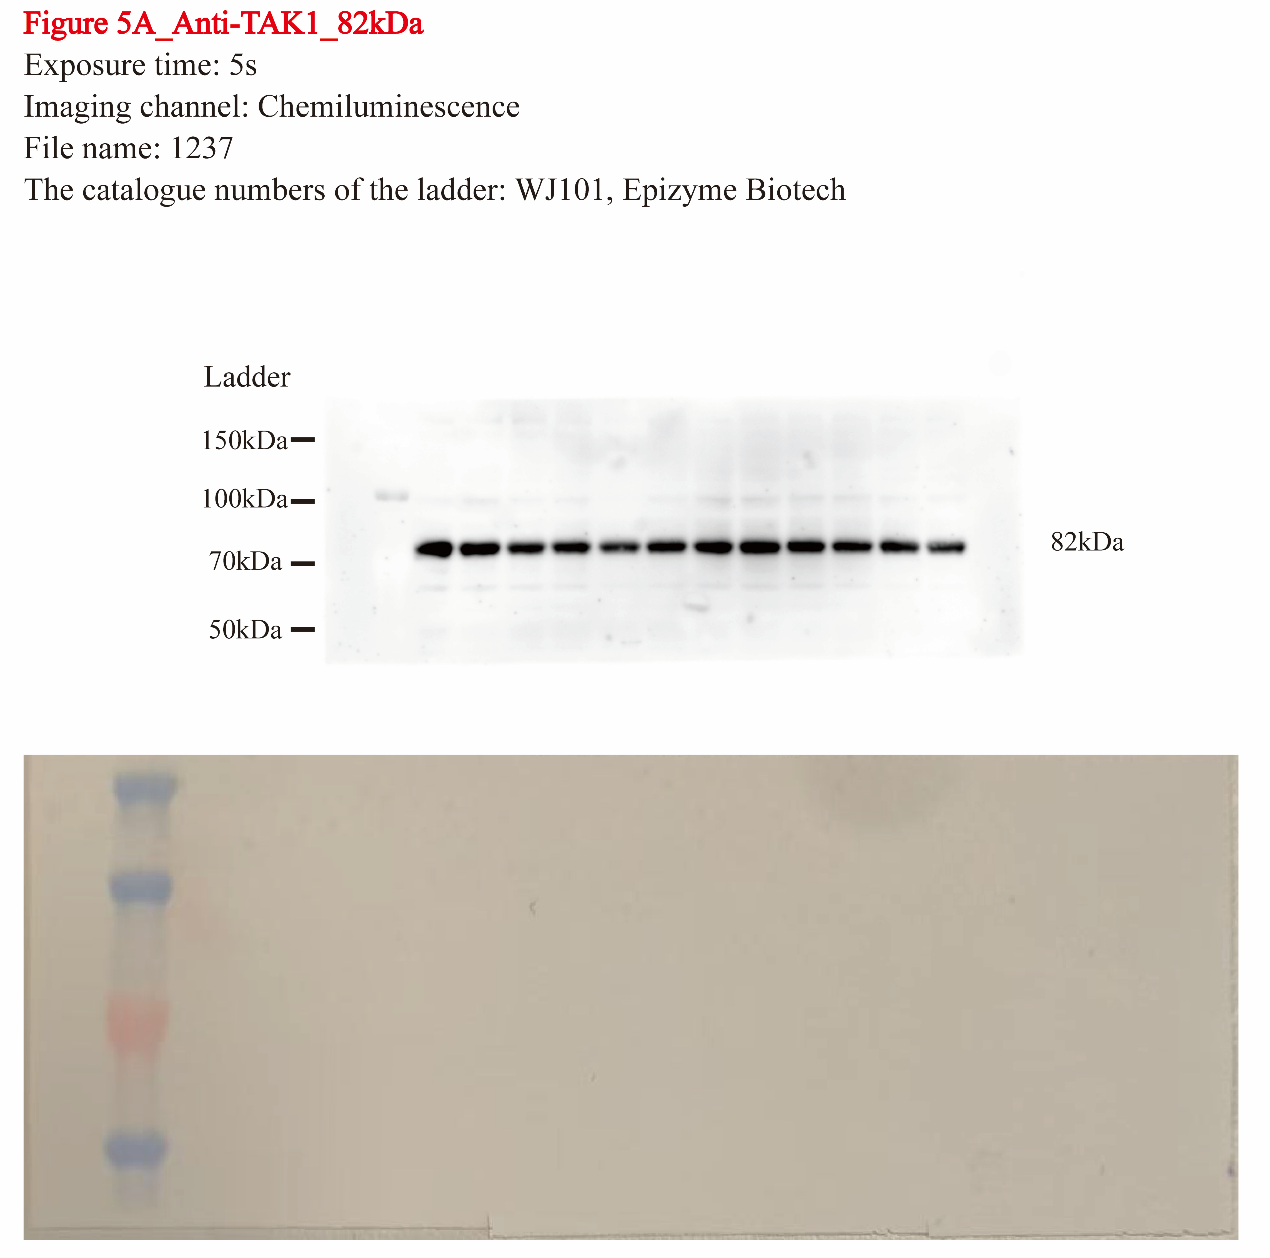


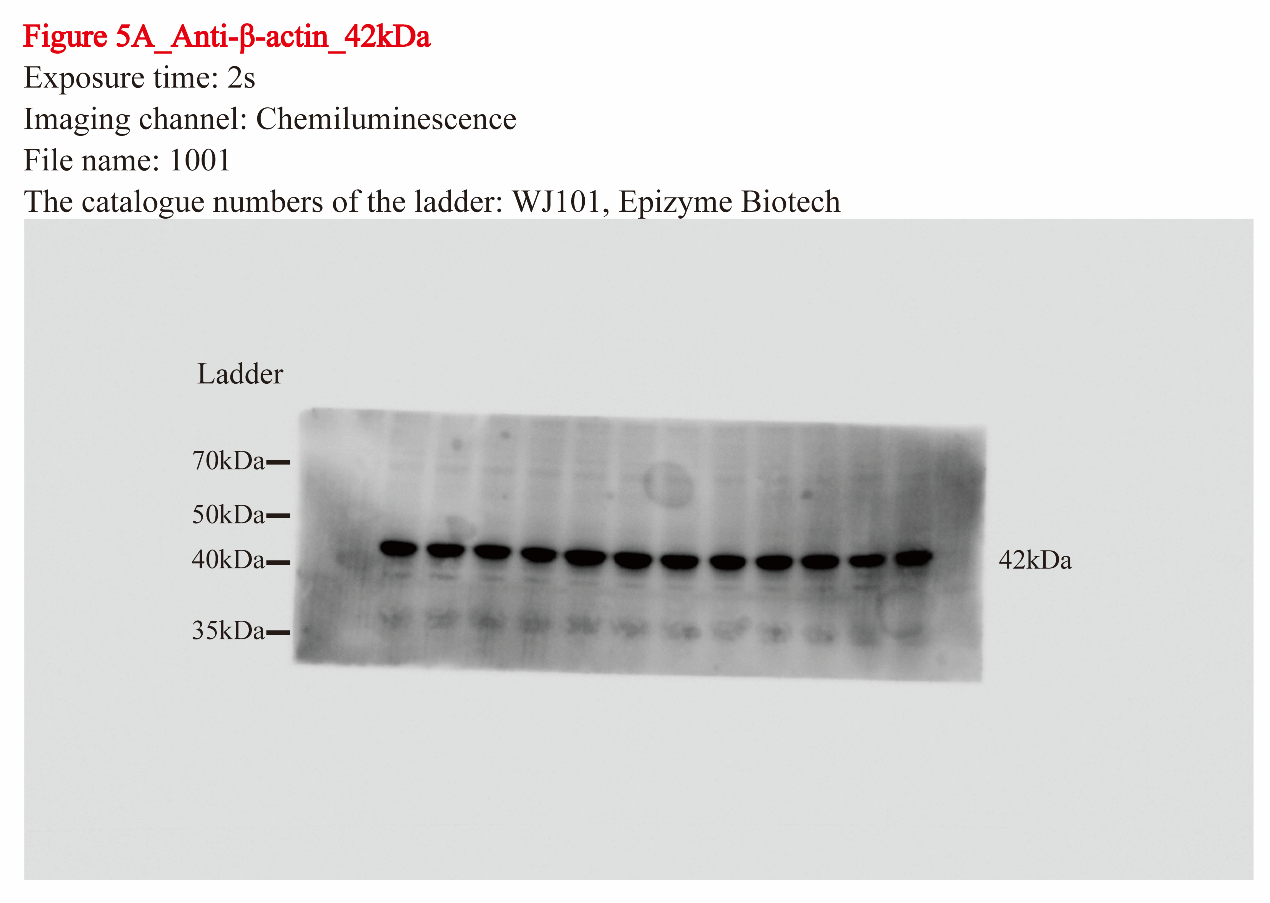


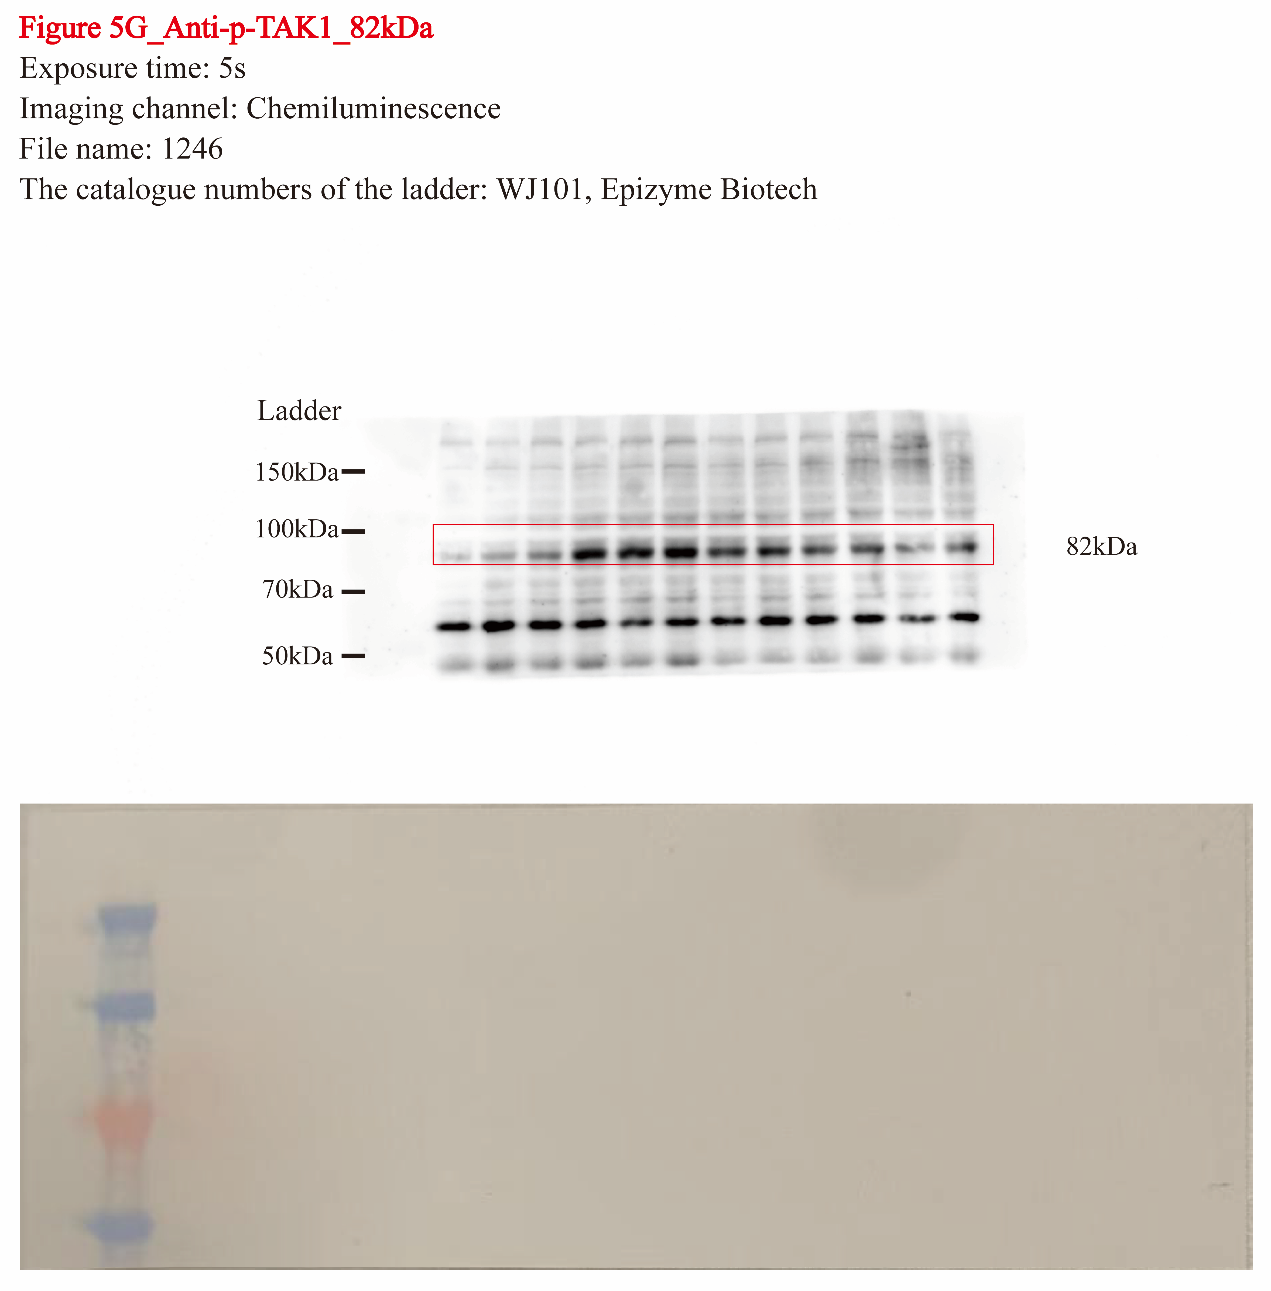


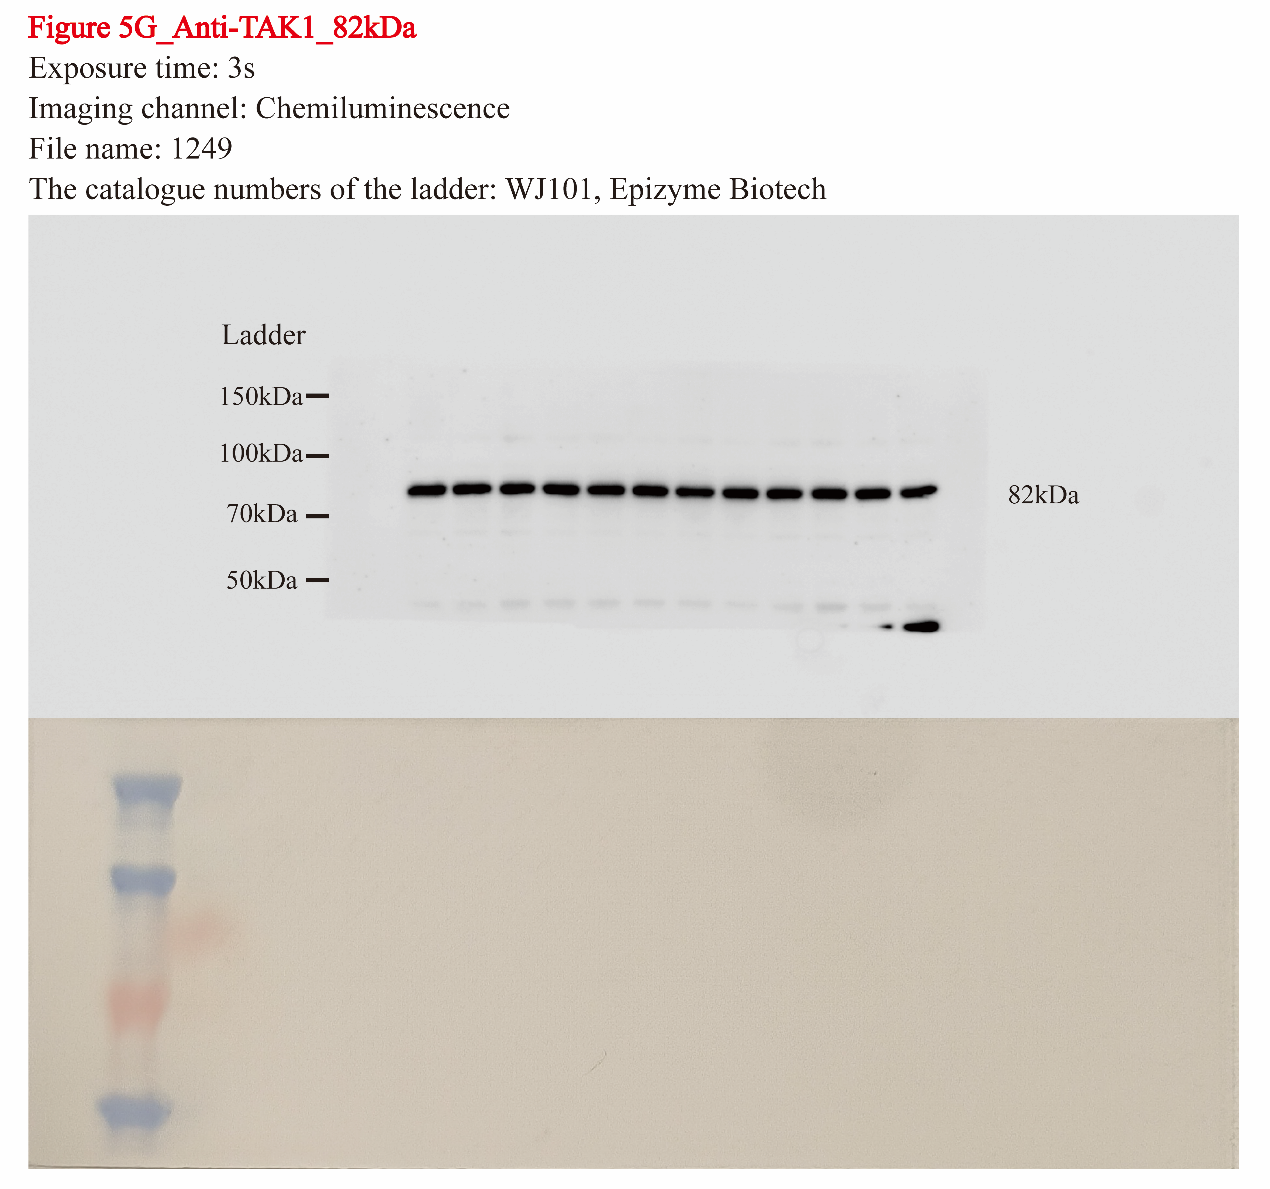


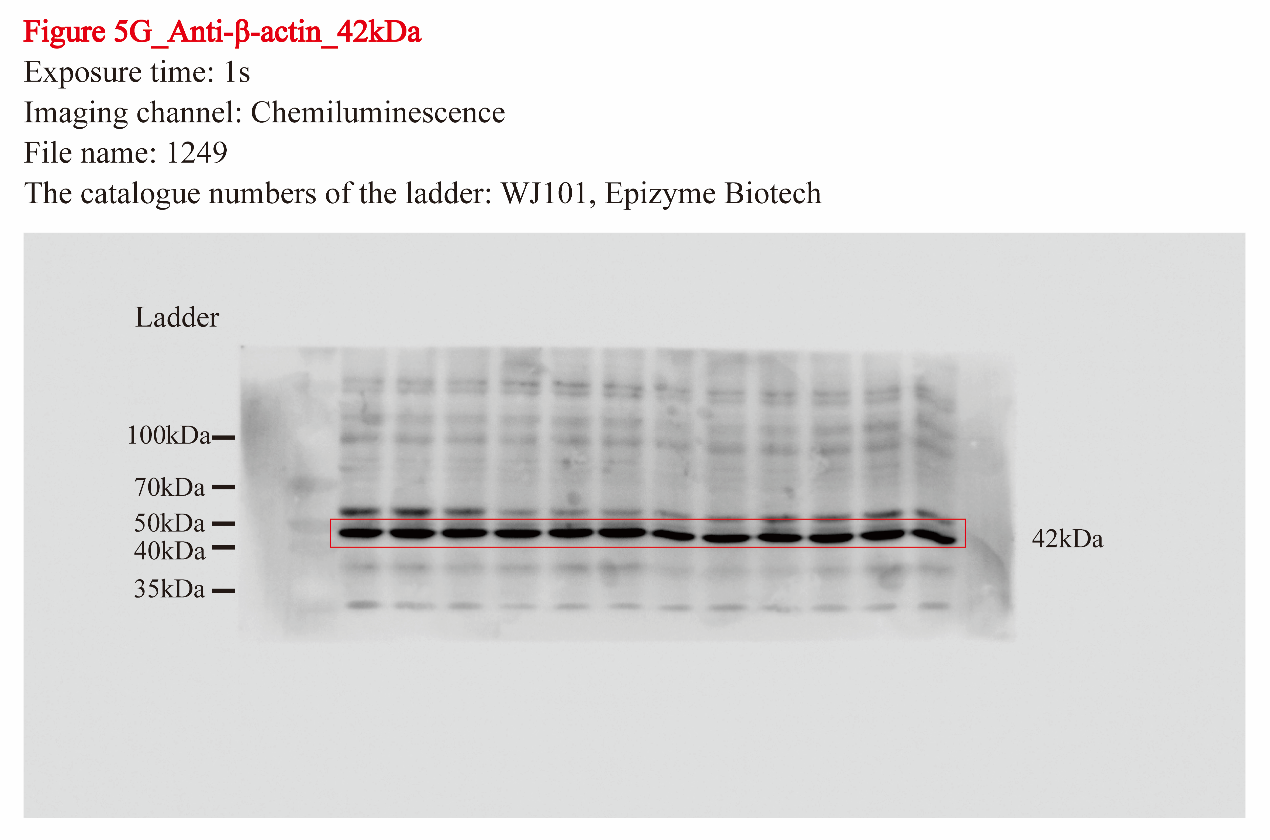


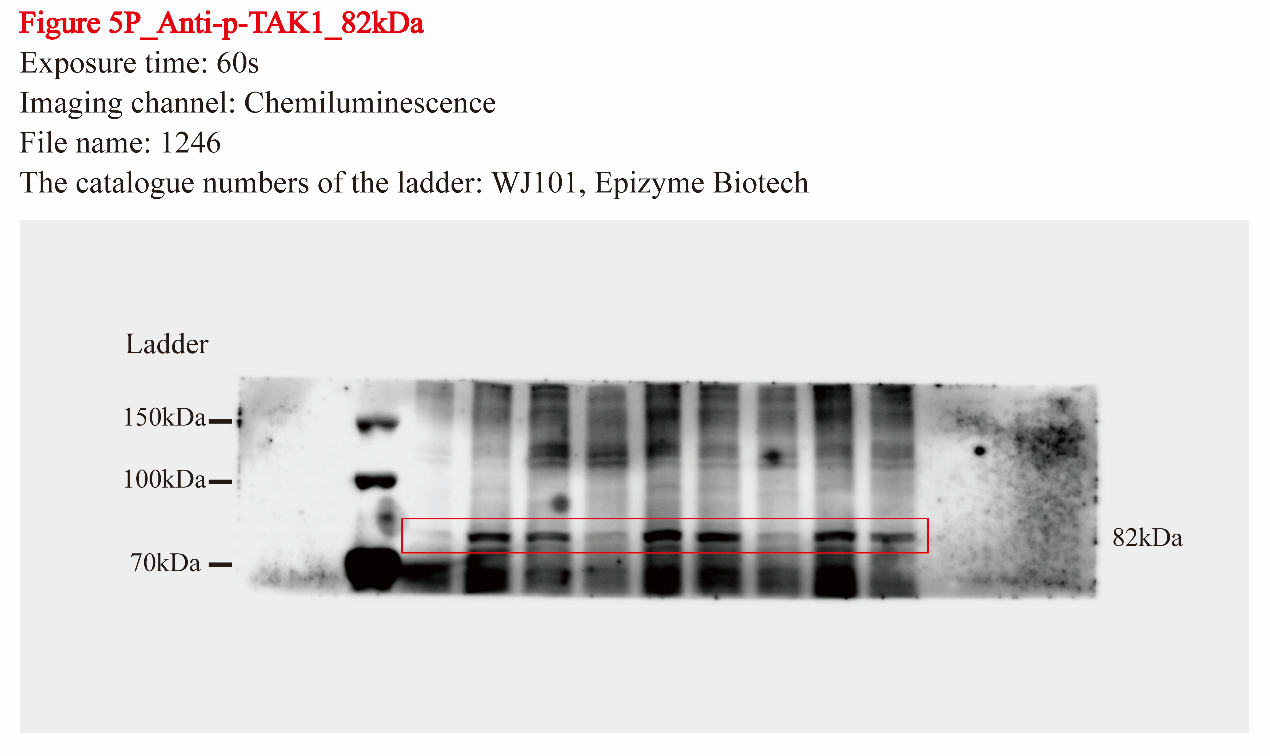


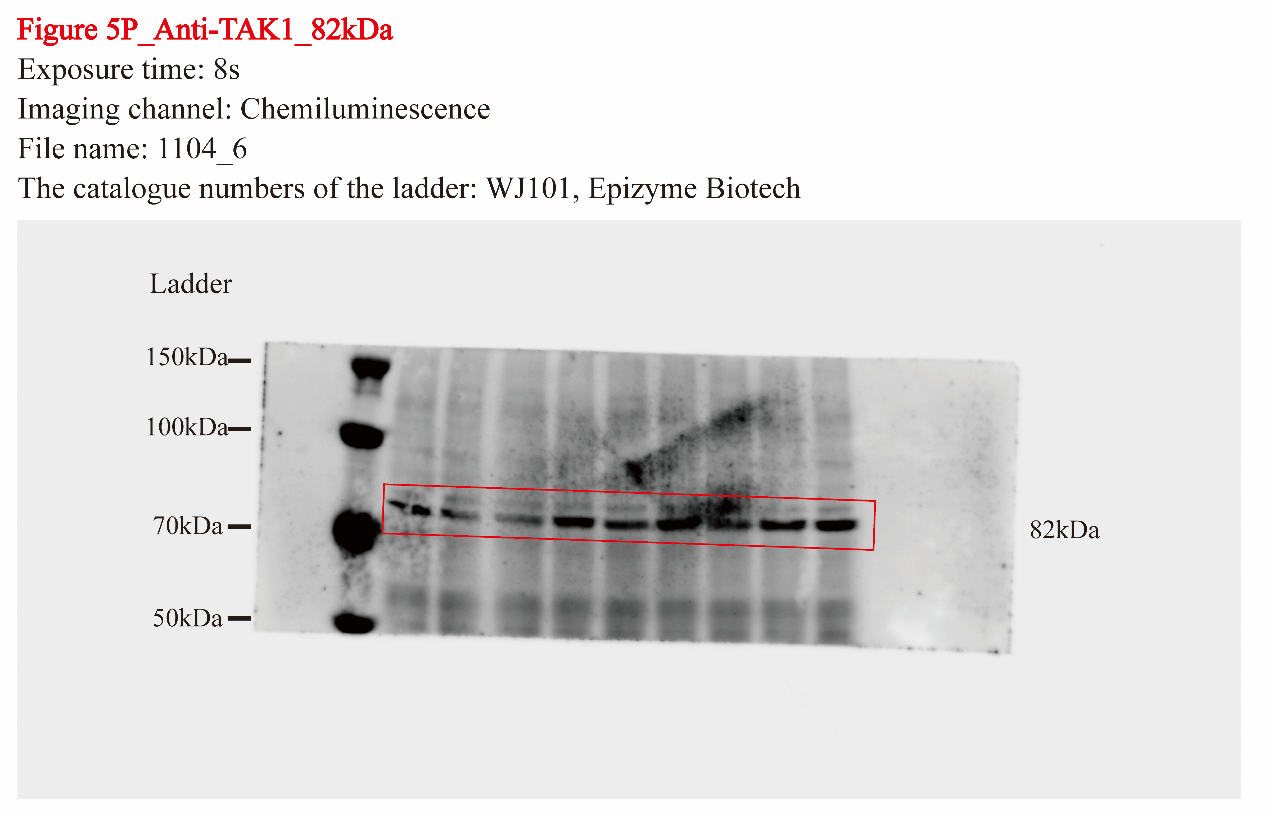


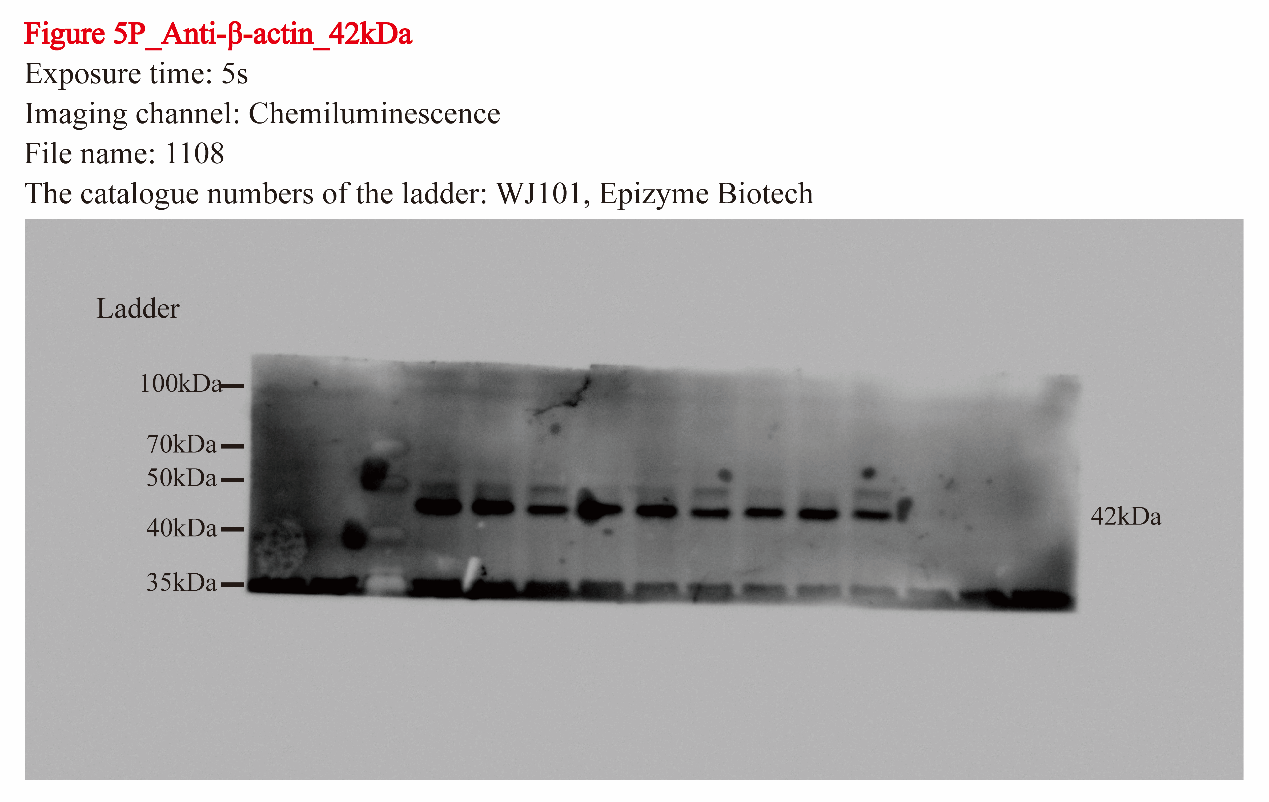

Supplement: Supplementary file 2 [file 5bc1d78581943cf2433cdb4b.docx]
