# Supplementary material
Source: Research Square preprint supplement (doi:10.21203/rs.3.rs-10134917/v1)
Supplement: Supplementary file 1 [file 071d91f7483b6a435042df9a.docx]

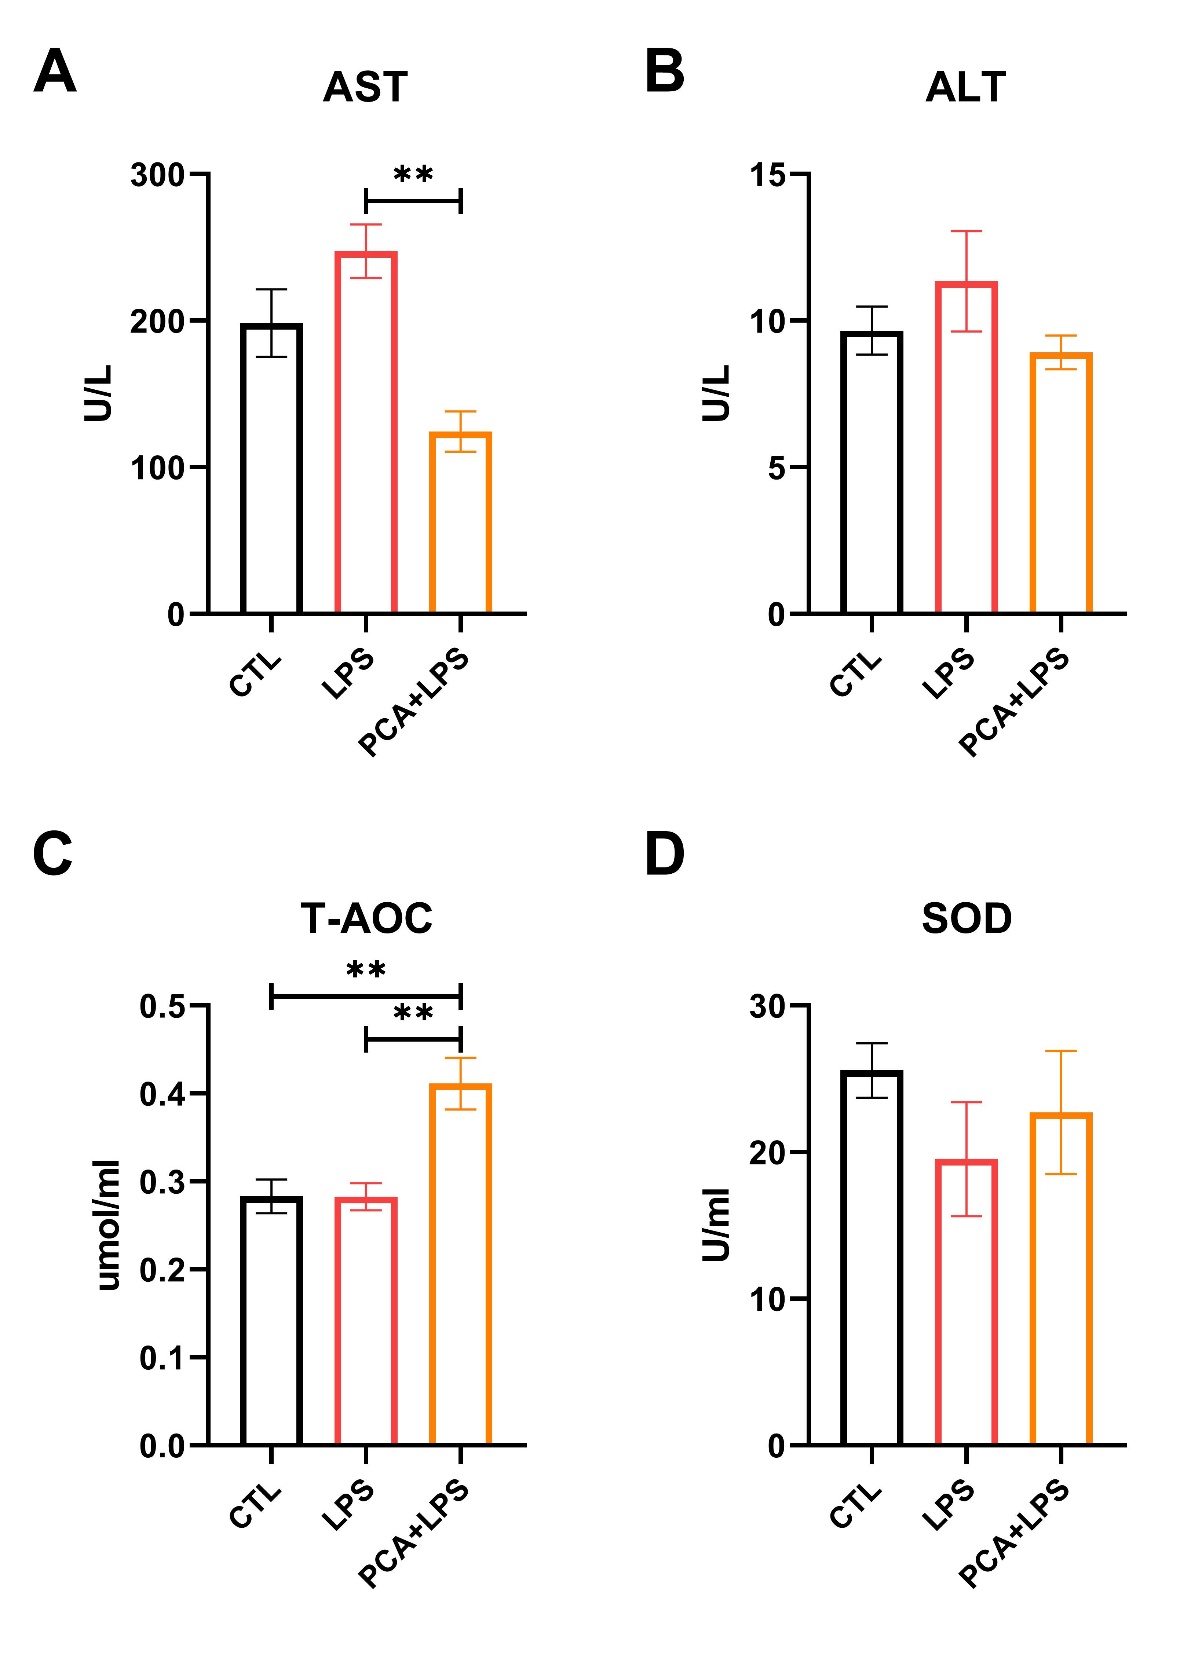


**Fig. S1.** PCA mitigated the inflammation and oxidative stress induced by LPS in piglets. The levels of AST and ALT in serum **(A&B)**; Changes in T-AOC and SOD in serum **(C&D)**. Data are shown as the means ± SEMs (n=6), **p < 0.05*, ***p < 0.01*.


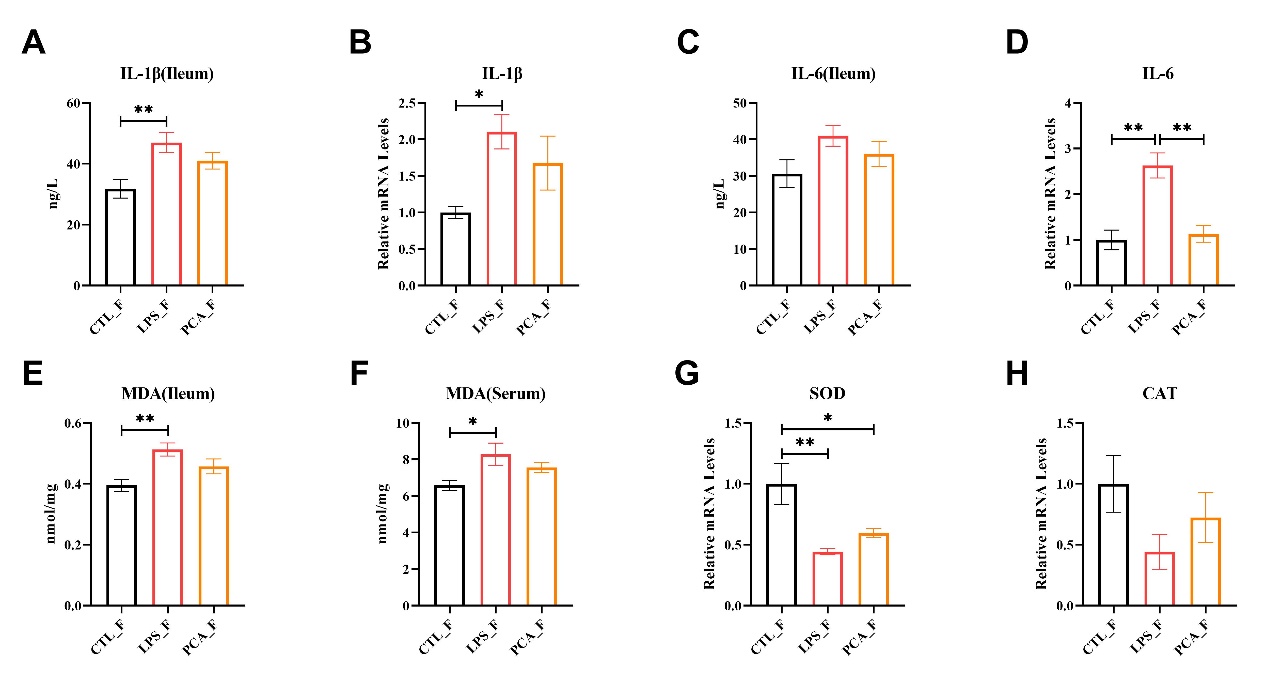


**Fig. S2.** FMT affected the anti-inflammatory and antioxidant capacity of mice. The effect of FMT on intestinal inflammation related indicators **(A-D)**; The content of MDA in mouse serum and intestinal tissue after FMT **(E&F)**; the relative mRNA expression levels of *SOD* and *Catalase (CAT)* in intestinal tissue **(G&H)**. Data are shown as the means ± SEMs (n=10), **p < 0.05*, ***p < 0.01*.


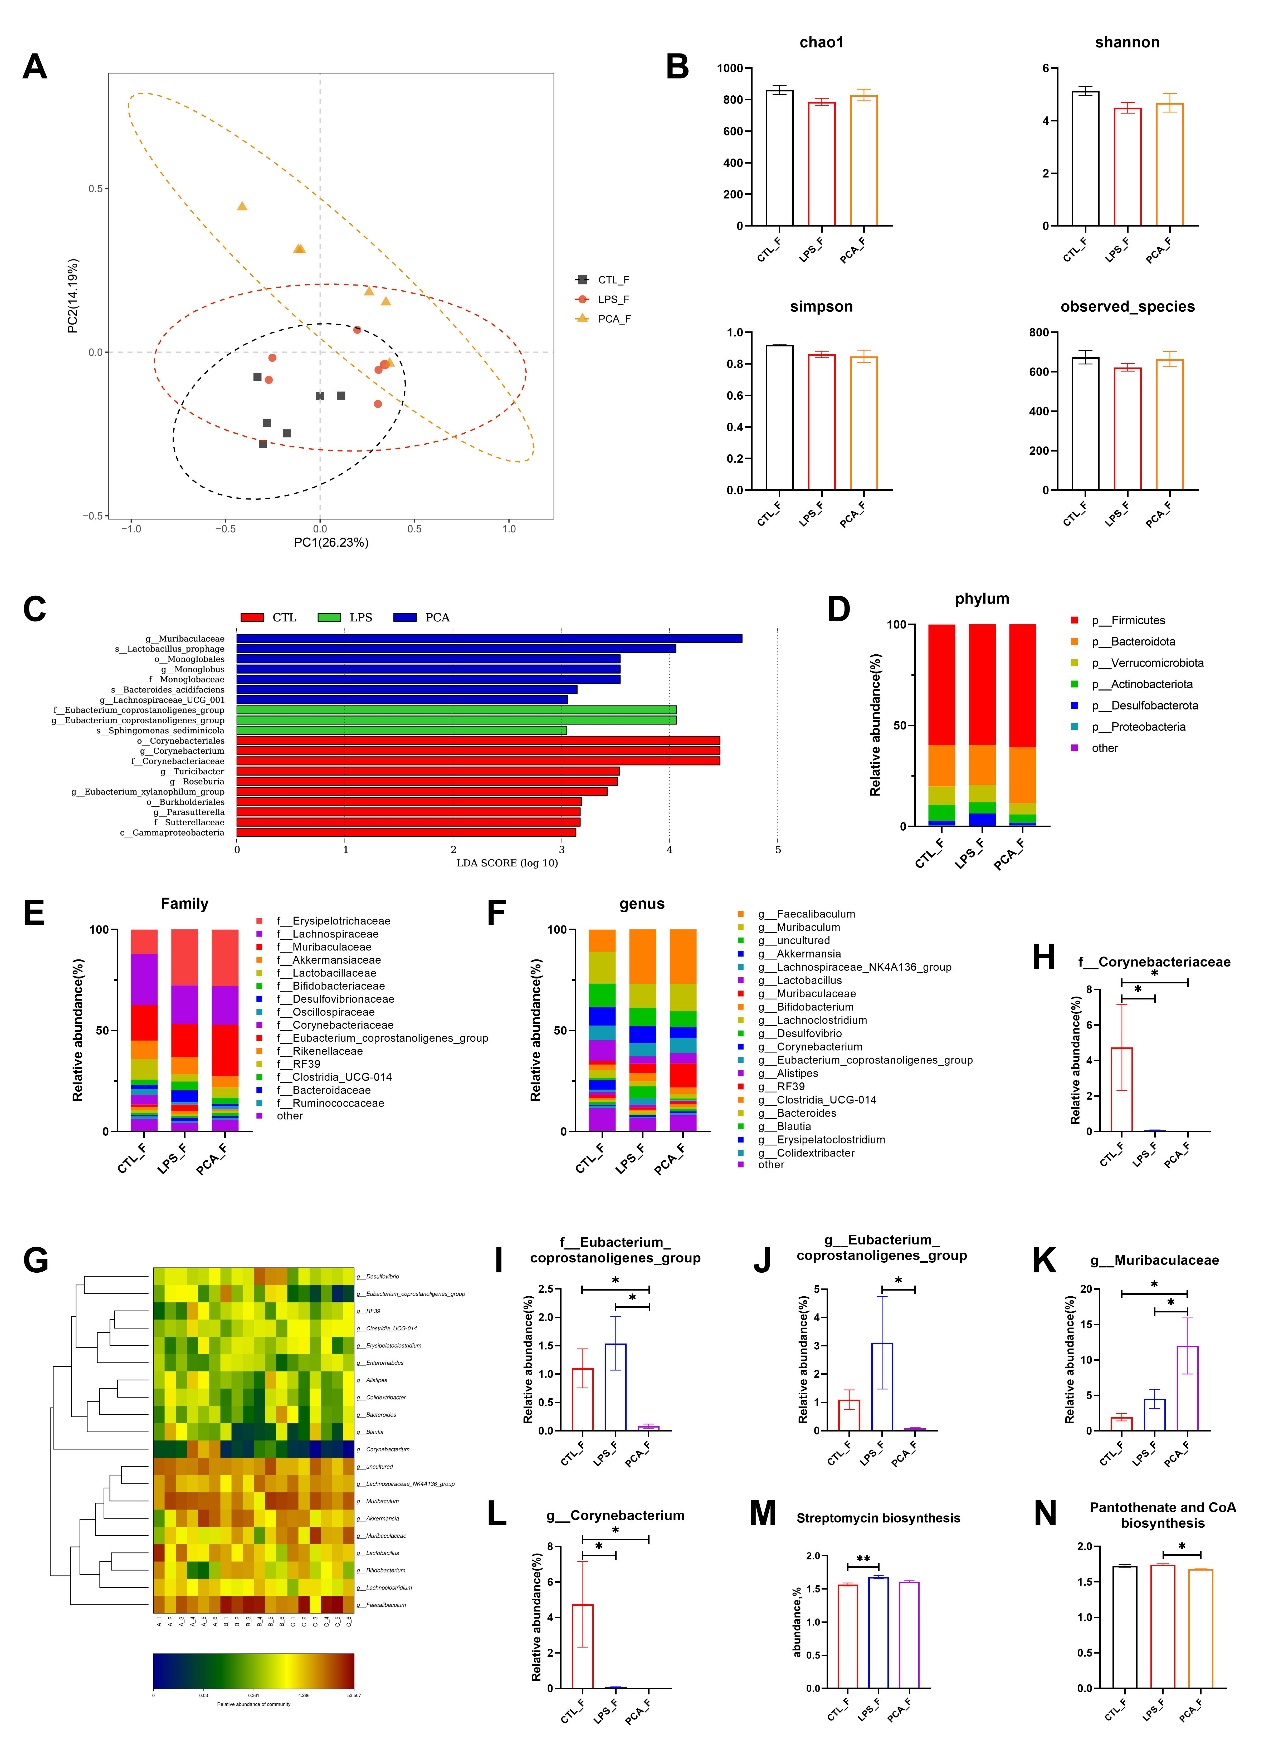


**Fig. S3.** FMT modified the composition of the gut microbiota in murine models. Principal Component Analysis (PCA) was employed for cluster analysis **(A)**; α diversity of gut microbiota in mice **(B)**; The main microbial differential groups of the three processed mice at all taxonomic levels, *p<0.05* and LDA score>3.00 are considered statistically significant **(C)**; The composition of gut microbiota at the phylum, family, and genus levels **(D-F)**;Relative abundance of differential microorganisms in various samples **(G)**; Proportions of differential abundant microbes among treatments **(H)**; KEGG enrichment analysis results **(M&N)**. Data are shown as the means ± SEMs (n=6), **p < 0.05*, ***p < 0.01*.


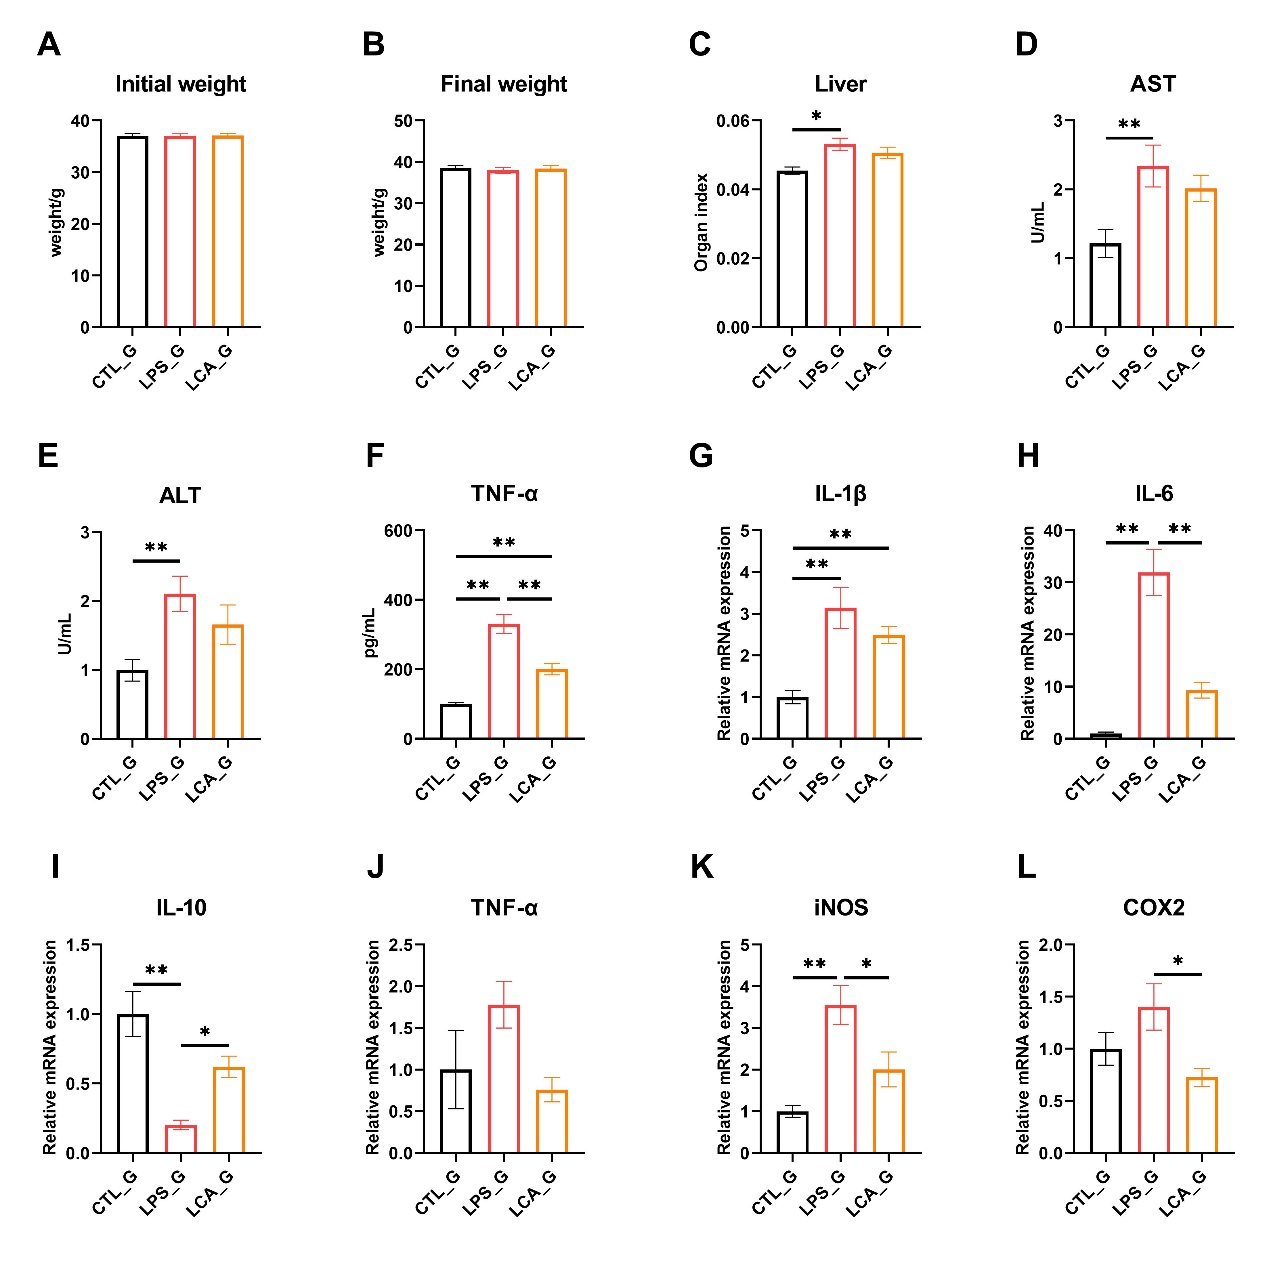


**Fig. S4.** The impact of LCA administration on murine models. The baseline body weight of the mice **(A)** and the subsequent alterations in their weight following pharmacological intervention **(B)**; Organ index of liver **(C)**; The levels of AST **(D)**, ALT **(E)**, and TNF-α in serum **(F)** (*n*=10); The relative mRNA expression levels of *IL-1β*, *IL-6*, *IL-10*, *TNF-α*, *iNOS* and *COX2* in intestinal tissue **(G-L)** (*n*=8), Data are shown as the means ± SEMs , **p < 0.05*, ***p < 0.01*.
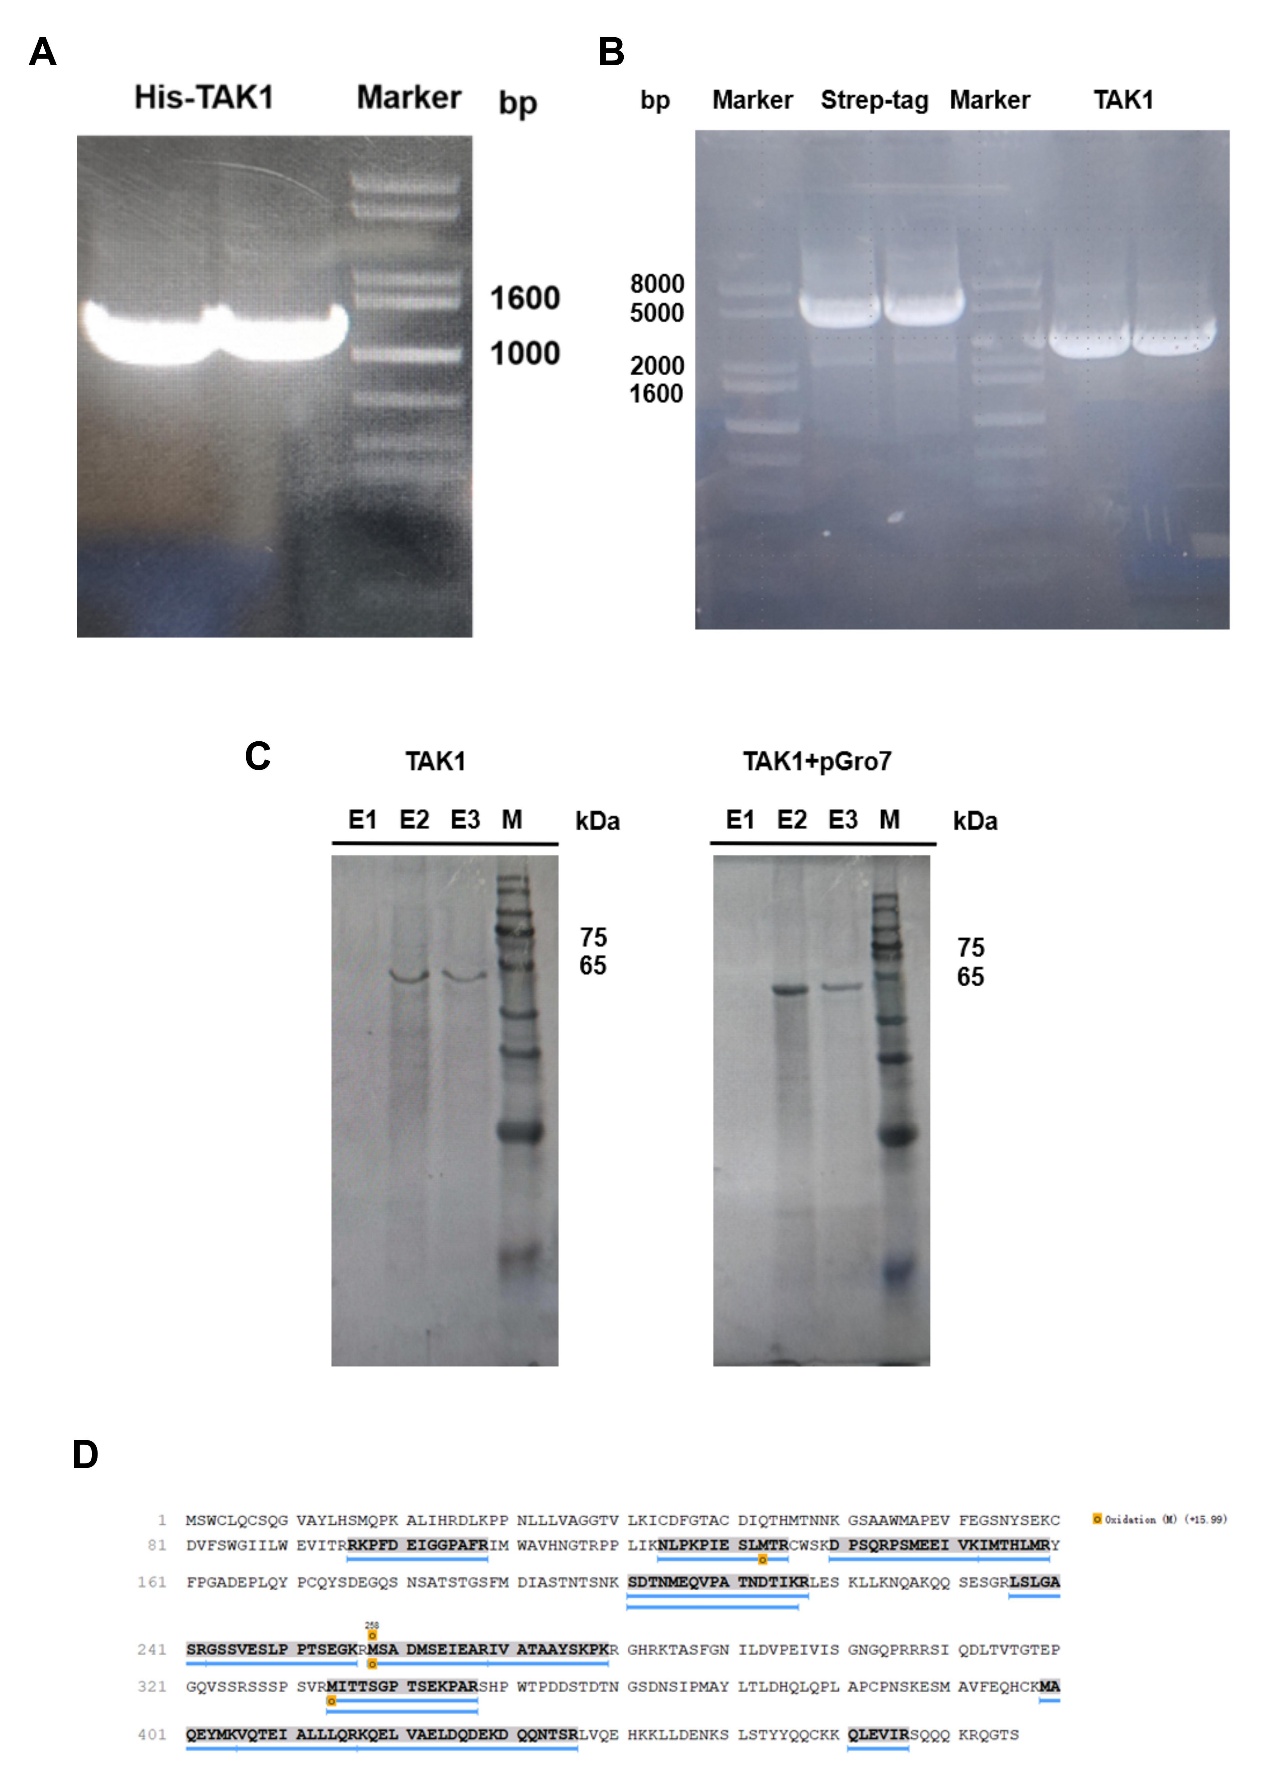


**Fig. S5.** Heterologous expression of TAK1 protein. Validation of the TAK1 gene **(A)**; Construction of Strep-TAK1 plasmid **(B)**; SDS-PAGE analysis of the purified Strep-TAK1 protein **(C)**; Mass spectrometry analysis of the purified Strep-TAK1 protein **(D)**.

**Table S1.** Antibody information and incubation conditions

|  | **Antibodies** | **Cat. No.** | **Diluted ratio** | **Loading quantity of protein sample** | **Incubation conditions** | **Exposure time** |
| --- | --- | --- | --- | --- | --- | --- |
| 1 | Phospho-TAK1(Thr184/187) | #4508, CST/  AF14603, AiFang biological | 1:1000  1:1000  1:500  1:500  1:1000 | 30μg  50μg  20μg  20μg  30μg | 4 °C overnight | 8-15s  5-10s  3-5s  5-10  60-120 |
| 2 | TAK1 | #5206, CST | 1:1000  1:1000  1:1000  1:1000  1:1000 | 20μg  30μg  10μg  20μg  40μg | 4 °C overnight | 4-6s  50-80s  5-10s  3-5s  8-15s |
| 3 | p-IKBα(S32/S36) | HA722770, HUABIO | 1:500 | 40μg | 4 °C overnight | 10-20s |
| 4 | IKBα | #9242, CST | 1:1000 | 20μg | 4 °C overnight | 8-15s |
| 5 | Phospho-NF-κB p65 (Ser536) | #3033, CST | 1:1000  1:500 | 30μg  20μg | 4 °C overnight | 30-50s  40-60s |
| 6 | P65 | #6956, CST | 1:1000  1:1000 | 15μg  15μg | 4 °C overnight | 4-10s  20-30s |
| 7 | Phospho-p44/42 MAPK (Erk1/2) (Thr202/Tyr204) | #4370, CST | 1:1000 | 20μg | 4 °C overnight | 4-6s |
| 8 | p44/42 MAPK (Erk1/2) | #4695, CST | 1:1000 | 20μg | 4 °C overnight | 1-4s |
| 9 | Phospho-p38 MAPK (Thr180/Tyr182 ) | #9211, CST | 1:1000  1:1000 | 20μg  20μg | 4 °C overnight | 3-5s  3-5s |
| 10 | p38 MAPK | #8690, CST | 1:1000  1:1000 | 15μg  15μg | 4 °C overnight | 3-5s  1-5s |
| 11 | Phospho-c-Jun (Ser73) | #3270, CST | 1:500 | 32μg | 4 °C overnight | 8-15s |
| 12 | c-Jun | ET1608-3, HUABIO | 1:500 | 20μg | 4 °C overnight | 6-10s |
| 13 | Occludin | EPR20992, Abcam | 1:1000 | 15μg | 4 °C overnight | 5-10s |
| 14 | ZO-1 | HL1185, Abcam | 1:1000 | 20μg | 4 °C overnight | 40-60s |
| 15 | β-actin | #4970, CST | 1:1000  1:1000  1:1000  1:1000 | 10μg  5μg  5μg  5μg | 4 °C overnight | 2-5s |
| 16 | HRP-linked Antibody | #7074, CST | 1: 5,000 | - | Room temperature for 1 h |  |

The same antibody has multiple parameters, which are organized according to the sequence of protein bands as presented in the text.

**Table S2.** The primers used in Experiment

| **Name** | **Sequence (5’-3’)** | **Size, bp** | **Species** |
| --- | --- | --- | --- |
| β-actin | F: CTATTGGCAACGAGCGGTTCC | 106 | pig |
|  | R: GCACTGTGTTGGCATAGAGGTC | 106 |  |
| IL-6 | F: GAGAGGAGACTTCACAGAGGATACC | 97 | pig |
|  | R: TCATTTCCACGATTTCCCAGAGAAC | 97 |  |
| TNF-α | F: CACGCTCTTCTGTCTACTGAACTTC | 116 | pig |
|  | R: CTTGGTGGTTTGTGAGTGTGAGG | 116 |  |
| Occludin | F: GTGGTAACTTGGAGGCGTCTTC | 101 | pig |
|  | R: CGTCGTGTAGTCTGTCTCGTAATG | 101 |  |
| ZO-1 | F: TGATGATCGTCTGTCCTACCTGTC | 105 | pig |
|  | R: CCGCCTTCTGTATCTGTGTCTTC | 105 |  |
| β-actin | F: CTATTGGCAACGAGCGGTTCC | 150 | mice |
|  | R: GCACTGTGTTGGCATAGAGGTC | 150 |  |
| IL-1β | F: TCGCAGCAGCACATCAACAAG | 94 | mice |
|  | R: TCCACGGGAAAGACACAGGTAG | 94 |  |
| IL-6 | F: GAGAGGAGACTTCACAGAGGATACC | 128 | mice |
|  | R: TCATTTCCACGATTTCCCAGAGAAC | 128 |  |
| IL-10 | F: GGACAACATACTGCTAACCGACTC | 75 | mice |
|  | R: ATTTCCGATAAGGCTTGGCAACC | 75 |  |
| CAT | F: CGGCACATGAATGGCTATGGATC | 93 | mice |
|  | R: CTGGTCGGTCTTGTAATGGAACTTG | 93 |  |
| SOD | F: AAGCGGTGAACCAGTTGTGTTG | 140 | mice |
|  | R: GTTTCTTAGAGTGAGGATTAAAATGAGGTC | 140 |  |
| Claudin-1 | F: TGTCCTACTTTCCTGCTCCTGTC | 78 | mice |
|  | R: GAAGGTGTTGGCTTGGGATAAGG | 78 |  |
| Occludin | F: TGGCTATGGCGGATATACAGACC | 86 | mice |
|  | R: TTACTAAGGAAGCGATGAAGCAGAAG | 86 |  |
| ZO-1 | F: GCGGATGGTGCTACAAGTGATG | 138 | mice |
|  | R: GCCTTCTGTATCTGTGTCTTCATAGTC | 138 |  |
| TNF-α | F: CACGCTCTTCTGTCTACTGAACTTC | 119 | mice |
|  | R: CTTGGTGGTTTGTGAGTGTGAGG | 119 |  |
| COX2 | F: GTGCCTGGTCTGATGATGTATGC | 80 | mice |
|  | R: GGATGCTCCTGCTTGAGTATGTC | 80 |  |
| iNOS | F: TCACTCAGCCAAGCCCTCAC | 113 | mice |
|  | R: TCCAATCTCTGCCTATCCGTCTC | 113 |  |
